# Supplementary material for: Treatment approach and survival from glioblastoma: results from a population-based retrospective cohort study from Western Norway
Source: PubMed Central journal article supplement — BMJ Open. 2021 Mar 12;11(3):e043208. doi: 10.1136/bmjopen-2020-043208 (PMC7959220; doi:10.1136/bmjopen-2020-043208), 2021-03-12
Supplement: bmjopen-2020-043208.draft_revisions.pdf [file bmjopen-2020-043208.draft_revisions.pdf]

# BMJ Open

BMJ Open is committed to open peer review. As part of this commitment we make the peer review history of every article we publish publicly available.

When an article is published we post the peer reviewers' comments and the authors' responses online. We also post the versions of the paper that were used during peer review. These are the versions that the peer review comments apply to.

The versions of the paper that follow are the versions that were submitted during the peer review process. They are not the versions of record or the final published versions. They should not be cited or distributed as the published version of this manuscript.

BMJ Open is an open access journal and the full, final, typeset and author-corrected version of record of the manuscript is available on our site with no access controls, subscription charges or pay-per-view fees (<http://bmjopen.bmj.com>).

If you have any questions on BMJ Open's open peer review process please email [info.bmjopen@bmj.com](mailto:info.bmjopen@bmj.com)

# BMJ Open

## Treatment approach and survival of glioblastoma: results from a population-based study

|                               |                                                                                                                                                                                                                                                                                                                                                                                                                                                                                                                                                                                                                                                                                                                                                                                                                                                                                                   |
|-------------------------------|---------------------------------------------------------------------------------------------------------------------------------------------------------------------------------------------------------------------------------------------------------------------------------------------------------------------------------------------------------------------------------------------------------------------------------------------------------------------------------------------------------------------------------------------------------------------------------------------------------------------------------------------------------------------------------------------------------------------------------------------------------------------------------------------------------------------------------------------------------------------------------------------------|
| Journal:                      | <i>BMJ Open</i>                                                                                                                                                                                                                                                                                                                                                                                                                                                                                                                                                                                                                                                                                                                                                                                                                                                                                   |
| Manuscript ID                 | bmjopen-2020-043208                                                                                                                                                                                                                                                                                                                                                                                                                                                                                                                                                                                                                                                                                                                                                                                                                                                                               |
| Article Type:                 | Original research                                                                                                                                                                                                                                                                                                                                                                                                                                                                                                                                                                                                                                                                                                                                                                                                                                                                                 |
| Date Submitted by the Author: | 30-Jul-2020                                                                                                                                                                                                                                                                                                                                                                                                                                                                                                                                                                                                                                                                                                                                                                                                                                                                                       |
| Complete List of Authors:     | <p>Bjorland, Line; Stavanger University Hospital, Department of Oncology; University of Bergen Faculty of Medicine and Dentistry, Department of Clinical Medicine</p> <p>Fluge, Oystein; Haukeland Universitetssjukehus, Department of Oncology and Medical Physics; University of Bergen Faculty of Medicine and Dentistry, Department of Clinical Science</p> <p>Gilje, Bjornar; Stavanger University Hospital, Department of Oncology; University of Bergen Faculty of Medicine and Dentistry, Department of Clinical Medicine</p> <p>Mahesparan, Rupavathana; Haukeland University Hospital, Department of Neurosurgery; University of Bergen Faculty of Medicine and Dentistry, Department of Clinical Medicine</p> <p>Farbu, Elisabeth; Stavanger University Hospital, Department of Neurology; University of Bergen Faculty of Medicine and Dentistry, Department of Clinical Medicine</p> |
| Keywords:                     | Neurological oncology < ONCOLOGY, CHEMOTHERAPY, Adult oncology < ONCOLOGY, Radiation oncology < RADIOTHERAPY                                                                                                                                                                                                                                                                                                                                                                                                                                                                                                                                                                                                                                                                                                                                                                                      |
|                               |                                                                                                                                                                                                                                                                                                                                                                                                                                                                                                                                                                                                                                                                                                                                                                                                                                                                                                   |

SCHOLARONE™  
Manuscripts

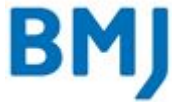

I, the Submitting Author has the right to grant and does grant on behalf of all authors of the Work (as defined in the below author licence), an exclusive licence and/or a non-exclusive licence for contributions from authors who are: i) UK Crown employees; ii) where BMJ has agreed a CC-BY licence shall apply, and/or iii) in accordance with the terms applicable for US Federal Government officers or employees acting as part of their official duties; on a worldwide, perpetual, irrevocable, royalty-free basis to BMJ Publishing Group Ltd ("BMJ") its licensees and where the relevant Journal is co-owned by BMJ to the co-owners of the Journal, to publish the Work in this journal and any other BMJ products and to exploit all rights, as set out in our [licence](#).

The Submitting Author accepts and understands that any supply made under these terms is made by BMJ to the Submitting Author unless you are acting as an employee on behalf of your employer or a postgraduate student of an affiliated institution which is paying any applicable article publishing charge ("APC") for Open Access articles. Where the Submitting Author wishes to make the Work available on an Open Access basis (and intends to pay the relevant APC), the terms of reuse of such Open Access shall be governed by a Creative Commons licence – details of these licences and which [Creative Commons](#) licence will apply to this Work are set out in our licence referred to above.

Other than as permitted in any relevant BMJ Author's Self Archiving Policies, I confirm this Work has not been accepted for publication elsewhere, is not being considered for publication elsewhere and does not duplicate material already published. I confirm all authors consent to publication of this Work and authorise the granting of this licence.

1  
2  
3 **Treatment approach and survival of glioblastoma: results from a**  
4 **population-based study**  
5  
6  
7

8 Line Sagerup Bjorland<sup>a,b</sup>, Øystein Fluge<sup>c,d</sup>, Bjørnar Gilje<sup>a</sup>, Rupavathana  
9 Mahesparan<sup>b,e</sup> and Elisabeth Farbu<sup>b,f</sup>  
10  
11

12  
13 *<sup>a</sup>Department of Oncology, Stavanger University Hospital, Norway; <sup>b</sup>Department of Clinical  
14 Medicine, University of Bergen, Norway; <sup>c</sup>Department of Oncology and Medical Physics,  
15 Haukeland University Hospital, Bergen, Norway; <sup>d</sup>Department of Clinical Science, University  
16 of Bergen, Norway; <sup>e</sup>Department of Neurosurgery, Haukeland University Hospital, Bergen,  
17 Norway; <sup>f</sup>Department of Neurology, Stavanger University Hospital, Norway*  
18  
19  
20  
21  
22

23 **Corresponding author:**

24 Line Sagerup Bjorland, M.D.  
25 Department of Oncology  
26 Stavanger University Hospital  
27 PO box 8100  
28 N-4068 Stavanger, Norway  
29 E-mail: [line.bjorland@sus.no](mailto:line.bjorland@sus.no)  
30 Telephone: +47 480 77 024  
31  
32  
33  
34  
35  
36  
37  
38  
39  
40  
41

42 **Key words:** neurological oncology; chemotherapy; radiotherapy; adult oncology.  
43  
44

45 **Word count:** 3400 words  
46  
47  
48  
49  
50  
51  
52  
53  
54  
55  
56  
57  
58  
59  
60

## ABSTRACT

**Objectives:** To evaluate treatment and survival of glioblastoma in a real-world setting.

**Setting:** A population-based retrospective cohort study including all ten hospitals in a predefined geographical area.

**Participants:** All patients aged 18 years or older diagnosed with glioblastoma between 1/1/2007 and 31/12/2014 were enrolled, both patients with histologically confirmed glioblastoma and patients with diagnosis based solely on typical MRI pattern. Patients from outside the region and patients with recurrent glioma, synchronous malignancies, or lack of informed consent were excluded, resulting in a cohort of 363 patients.

**Primary and secondary outcome measures:** Median overall survival and survival rates. Associations between radiological and clinical characteristics and treatment approach measured by unadjusted and adjusted odds ratio.

**Results:** Median overall survival was 10.2 months (95% CI 9.1-11.3). Resection was performed in 221 patients (60.9%), and was inversely associated with age over 70 years, deep-seated tumour, tumour invasion of the corpus callosum, and multifocality. Median survival was 13.7 months (95% CI 12.1-15.4) in patients having performed resection, 8.3 months (95% CI 6.6-9.9) in patients undergone biopsy, and 4.5 months (95% CI 4.0-5.1) in patients where no surgical intervention was performed. Chemoradiotherapy according to the Stupp protocol was given to 157 patients (43%). Age over 70 years, cognitive impairment, and

1  
2  
3 tumour invasion of the corpus callosum were associated with less intensive  
4  
5 chemoradiotherapy. Median survival was 16.3 months (95% CI 14.1-18.5), 7.9  
6  
7 months (95% CI 6.7-9.0), and 2.0 months (95% CI 0.9-3.2) in patients treated  
8  
9 according to the Stupp protocol, less intensive chemoradiotherapy and best  
10  
11 supportive care, respectively.  
12  
13  
14  
15

16 **Conclusions:** In a real-world setting, less than half of the patients received full-  
17  
18 course chemoradiotherapy, with a median survival comparable to results from  
19  
20 clinical trials. Survival was considerably worse in patients receiving less  
21  
22 intensive treatment. Our results point out a risk of undertreating glioblastoma,  
23  
24 especially in elderly patients.  
25  
26  
27  
28  
29  
30

### 31 **STRENGTHS AND LIMITATIONS OF THE STUDY**

- 32 • This population-based study provides knowledge on treatment and survival of  
33  
34 glioblastoma in a real-world setting, including the establishment of long-term survival  
35  
36 rates.  
37  
38
- 39 • To our knowledge, this is the first study to use a standardized score in the assessment  
40  
41 of comorbidity burden in patients with glioblastoma.  
42  
43
- 44 • Detailed information on treatment and complications were available in all patients,  
45  
46 within a common patient record system throughout the region.  
47  
48
- 49 • We included both patients with histologically confirmed glioblastoma and patients  
50  
51 with MRI-based diagnosis, to counteract the exclusion of elderly, frail patients and  
52  
53 patients with deep-seated tumours where biopsy were considered not feasible.  
54  
55
- 56 • Among the limitations of this study were the lack of molecular analysis and  
57  
58 standardized performance assessment.  
59  
60

## INTRODUCTION

Glioblastoma (GBM) is the most frequent of the malignant primary brain tumours in adults.<sup>1 2</sup> Prognosis is poor, with a median overall survival of approximately 11 months and a five-year survival of less than 6% reported from population-based materials.<sup>1 3</sup> Standard diagnostic procedures in patients with primary brain tumours include neuroimaging and histopathological and molecular classification.<sup>4</sup> However, when clinicians consider a biopsy unsafe or not feasible, i.e. in patients with poor functional status or patients harbouring a deep-seated tumour, the diagnosis is based solely on radiological characteristics. Advanced Magnetic Resonance Imaging (MRI) modalities have resulted in a high ability to differentiate GBM from other intracranial lesions.<sup>5 6</sup>

Standard of care is maximal safe resection or biopsy followed by chemoradiotherapy (CRT).<sup>4 7</sup> Implementation of the Stupp protocol, i.e. radiation therapy given as 60 Gy in 2 Gy fractions with concomitant Temozolomide (Tmz) followed by six courses of Tmz monotherapy, improved overall survival in patients in good performance status and age up to 70 years, and is currently standard of care.<sup>4 8</sup> Clinical trials have demonstrated that hypofractionated radiation therapy with or without Tmz, or Tmz alone if O<sup>6</sup>-methylguanine-DNA methyl transferase (MGMT) promoter is methylated, are beneficial treatment options in elderly patients.<sup>9-11</sup> Best supportive care may be an appropriate approach in elderly and very frail patients, particularly in patients with multifocal or large tumours.<sup>4</sup> Elderly patients, patients with poor performance status, and patients lacking histological confirmation of the diagnosis, are excluded from most clinical trials. This may result in selection bias and impact on survival rates.

We aimed to determine overall survival from GBM in an unselected cohort of consecutive patients diagnosed with GBM during an eight years period in a geographically

1  
2  
3 defined area of Western Norway. Furthermore, to analyse clinical and radiological  
4  
5 characteristics associated with treatment approach, and the association between treatment  
6  
7 intensity and survival.  
8  
9

## 10 11 **METHODS**

12  
13  
14 This was a population-based, retrospective cohort study of patients diagnosed with  
15  
16 glioblastoma (GBM) between 1/1/2007 and 31/12/2014. Patients aged 18 years or older,  
17  
18 diagnosed with International Classification of Diseases 10th Revision (ICD-10) code C71  
19  
20 (malignant neoplasm of brain) or C72 (malignant neoplasm of spinal cord, cranial nerves and  
21  
22 other parts of central nervous system) in the Western region of Norway, were identified  
23  
24 through electronic medical records. Both patients with histologically verified GBM and  
25  
26 patients where the GBM diagnosis was based solely on typical MRI characteristics were  
27  
28 enrolled. Patients from outside the region and patients with recurrent glioma, synchronous  
29  
30 malignancies, or lack of informed consent were excluded. Ten hospitals in the predefined  
31  
32 geographical region served population of approximately 1.020.000 in the study period <sup>12</sup>. All  
33  
34 hospitals provided medical treatment and supportive care in patients with GBM.  
35  
36  
37 Neurosurgical treatment of patients with brain tumour was centralized to one hospital, while  
38  
39 radiation therapy was centralized to two hospitals in the region.  
40  
41  
42  
43  
44

45 Demographics and patient characteristics were identified (table 1). Time of diagnosis  
46  
47 was defined as the date of first MRI detecting the primary brain tumour. The follow-up period  
48  
49 was at least five years or until death. We defined patients aged 70 years and older as elderly,  
50  
51 based on the cut-off value in relevant studies and clinical practice in the region.<sup>9 13-16</sup>  
52  
53 Comorbidity was classified according to Charlson comorbidity index, and we defined a cut-  
54  
55 off score of seven or more as a high comorbidity burden.<sup>17</sup> We registered any cognitive  
56  
57 impairment described by clinicians, regardless of severity and causation. Radiological  
58  
59  
60



1  
2  
3 characteristics were obtained from MRI reports. MGMT promoter methylation and IDH  
4  
5 mutation were not implemented as routine analyses in the study period.  
6  
7

8 Information regarding primary treatment, complications, and survival were collected  
9  
10 from medical records. Surgery was categorized into resection, biopsy, and no surgical  
11  
12 intervention. Primary CRT was categorized into full-intensive treatment according to the  
13  
14 Stupp protocol, less intensive CRT, and best supportive care. Treatment according to the  
15  
16 Stupp protocol was defined as a delivered radiation dose of 60 Gy (and optional additional  
17  
18 boost), concomitant Tmz throughout the entire radiation therapy period, and at least one out  
19  
20 of six planned Tmz monotherapy courses fulfilled, in concordance with a previous and  
21  
22 comparable study.<sup>18</sup> Less intensive CRT was further classified into i) full-course radiation  
23  
24 therapy (60 Gy in 2 Gy fractions) and Tmz to a less extent than the Stupp protocol, ii) short-  
25  
26 course radiation therapy with concomitant and at least one Tmz monotherapy course, iii)  
27  
28 short-course radiation therapy with Tmz to a less extent or no Tmz, and iv) Tmz monotherapy  
29  
30 without radiation therapy.  
31  
32  
33  
34

35 Adverse events and complications including infections, bone marrow suppression  
36  
37 grade 3-4 according to CTCAE (Common Terminology Criteria for Adverse Events) Version  
38  
39 5.0, venous thromboembolism, epileptic seizures, and osteoporosis (defined as low-energy  
40  
41 fracture or bone density below -2.5 standard deviation measured by bone density scan) were  
42  
43 identified. We calculated survival rates from time of diagnosis, and defined long-term  
44  
45 survival as survival of more than five years.  
46  
47  
48  
49  
50

### 51 **Patient and public involvement**

52 Patients or the public were not involved in this study.  
53  
54  
55  
56  
57  
58  
59  
60

## Ethics

The study was approved by the Regional Committees for Medical and Health Research Ethics (no. 2014/1931). Informed consent was obtained from patients alive at the time of inclusion.

A waiver of consent was approved for deceased patients.

## Statistics

We used Chi-square Test or Fisher's Exact Test as appropriate for categorical variables.

Continuous variables were compared using t-test for normally distributed data, otherwise by Mann-Whitney U test. Verification of normality was done by quantile-quantile (Q-Q) plots.

Clinical and radiological characteristics and their associations with treatment approach were analysed using binomial logistic regression, in which variables considered reasonably likely to influence on management approach were included in the model. Survival analyses were performed using Kaplan Meier plot and log-rank test. Two-sided p-values <0.05 were considered statistically significant. Statistical analyses were performed in IBM SPSS Statistics version 24 (SPSS Inc., Chicago, IL, USA).

## RESULTS

We identified 381 patients diagnosed with GBM in the predefined geographical region between 1/1/2007 and 31/12/2014. Among these, 16 patients were excluded according to exclusion criteria (non-resident (n=1), previous low-grade or anaplastic glioma (n=10), synchronous cancer (n=4), and lack of informed consent (n=1)). One patient was lost to follow-up and one patient was excluded due to disproved GBM diagnosis by autopsy. Finally, 363 patients diagnosed with GBM in the predefined period were included. None of these patients were included in clinical trials. Histological confirmation of the diagnoses was lacking in 90 patients (24.8%), including two patients with non-representative biopsies, where

the diagnosis was based on typical MRI characteristics. Among patients aged over 70 years, 65 of 127 patients (51.2%) lacked histological confirmation of the diagnosis, compared to 25 of 236 patients (10.6%) aged under 70 years.

### Tumour and patient characteristics

Median age at time of diagnosis was 64.6 years (range 18.1-94.9). Median age in patients with histologically confirmed GBM was 61.5 years (range 18.1-86.1), compared to 77.0 years (range 35.0-94.9) in patients with MRI-based diagnosis ( $p<0.0001$ ). Mean Charlson comorbidity score was 3.9 (standard deviation (SD) 1.4) in patients with histologically confirmed GBM, compared to 5.7 (SD 1.6) in patients with MRI-based GBM diagnosis ( $p<0.0001$ ). Male/female ratio was 1.39. Additional patient and tumour characteristics are outlined in table 1.

**Table 1. Patient and tumour characteristics in adults diagnosed with glioblastoma between January 2007 and December 2014**

|                                      | Total cohort<br>n=363 | Histological<br>confirmed GBM<br>n=273 | MRI-based<br>diagnosis of GBM*<br>n=90 | p-value          |
|--------------------------------------|-----------------------|----------------------------------------|----------------------------------------|------------------|
| <i>Patient characteristics</i>       |                       |                                        |                                        |                  |
| Male gender                          | 211 (58%)             | 155 (57%)                              | 56 (62%)                               | 0.364            |
| Age $\geq$ 70 years                  | 127 (35%)             | 62 (23%)                               | 65 (72%)                               | <b>&lt;0.001</b> |
| Charlson comorbidity score $\geq$ 7  | 41 (11%)              | 15 (5%)                                | 26 (29%)                               | <b>&lt;0.001</b> |
| Initial symptoms                     |                       |                                        |                                        |                  |
| Cognitive impairment                 | 171 (47%)             | 126 (46%)                              | 45 (50%)                               | 0.526            |
| Headache                             | 159 (44%)             | 134 (49%)                              | 25 (28%)                               | <b>&lt;0.001</b> |
| Mono-/hemiparesis                    | 122 (34%)             | 85 (31%)                               | 37 (41%)                               | 0.089            |
| Epilepsy at initial diagnosis        | 110 (30%)             | 97 (36%)                               | 13 (14%)                               | <b>&lt;0.001</b> |
| Central facial palsy                 | 96 (26%)              | 65 (24%)                               | 31 (34%)                               | 0.047            |
| Dysphasia                            | 85 (23%)              | 63 (23%)                               | 22 (24%)                               | 0.790            |
| Severe gait dysfunction <sup>†</sup> | 61 (17%)              | 32 (12%)                               | 29 (32%)                               | <b>&lt;0.001</b> |
| Dizziness                            | 62 (17%)              | 38 (14%)                               | 24 (27%)                               | <b>&lt;0.001</b> |
| Visual field loss                    | 54 (15%)              | 38 (14%)                               | 16 (18%)                               | <b>0.044</b>     |
| Previous radiation therapy to brain  | 4 (1%)                | 4 (1%)                                 | 0                                      | 0.486            |

|                                        |           |           |          |                  |
|----------------------------------------|-----------|-----------|----------|------------------|
| First-degree relative with GBM         | 3 (1%)    | 3 (1%)    | 0        | 0.318            |
| <i>Tumour characteristics</i>          |           |           |          |                  |
| Tumour localization                    |           |           |          |                  |
| Frontal                                | 88 (24%)  | 67 (25%)  | 21 (23%) | 0.897            |
| Temporal                               | 82 (23%)  | 68 (25%)  | 14 (16%) | 0.080            |
| Parietal                               | 28 (8%)   | 23 (8%)   | 5 (6%)   | 0.403            |
| Occipital                              | 9 (2%)    | 6 (2%)    | 3 (3%)   | 0.526            |
| Overlapping                            | 108 (30%) | 89 (33%)  | 19 (21%) | 0.050            |
| Deep seated <sup>†</sup>               | 46 (13%)  | 20 (7%)   | 26 (29%) | <b>&lt;0.001</b> |
| Corpus callosum invasion               | 100 (28%) | 65 (24%)  | 35 (39%) | <b>0.005</b>     |
| Radiologic sign of gliomatosis cerebri | 8 (2%)    | 7 (3%)    | 1 (1%)   | 0.425            |
| Multifocality                          | 90 (25%)  | 68 (25%)  | 22 (24%) | 0.930            |
| MRI contrast enhancement               |           |           |          |                  |
| Circular (central necrosis)            | 263 (73%) | 194 (71%) | 69 (77%) | 0.458            |
| Irregular/patchy                       | 27 (7%)   | 21 (8%)   | 6 (7%)   | 0.673            |
| No enhancement                         | 3 (1%)    | 3 (1%)    | 0 -      | 0.546            |
| Information not available              | 45 (12%)  | 35 (13%)  | 10 (11%) | 0.670            |

Results presented in absolute numbers and % of total. Comparison between groups (histological confirmed GBM and MRI based GBM diagnosis) was performed by Chi-square Test (Fisher's Exact Test when expected cell count <5).

\* Highly suspected GBM based on typical MRI characteristics, biopsy not performed; † Inability to walk without support; ‡ Thalamus, basal ganglia, internal capsula, splenium corpus callosum, mesencephalon, brain stem, and cerebellum. GBM=glioblastoma; MRI=magnetic resonance imaging.

Headache and epilepsy were more frequent in patients with histologically confirmed GBM compared to patients with MRI-based diagnosis, while dizziness and gait dysfunction were more frequent among patients with MRI-based diagnosis. Classification of performance status by validated screening tools (e.g. ECOG and Karnofsky score) was not applicable due to insufficient description of performance status in the medical files.

### Treatment and complications

Treatment approach in the total cohort is described in figure 1. Resection was performed in 221 of 363 patients (60.9%). Radiation therapy was given to 323 patients (89.0%), where full-course radiation therapy (60 Gy or 60Gy with additional boost) was planned or commenced in 218 patients. Among these 218 patients, 14 patients (6.4%) had the treatment cancelled (n=1),

1  
2  
3 discontinued (n=5), or converted to a short-course regimen (n=8). Change in radiation therapy  
4  
5 plan was due to poor general condition or rapid clinical deterioration (n=11), patient  
6  
7 preferences (n=2), or acute complications (n=1). Further, 120 patients were allocated to short-  
8  
9 course radiation therapy. Among these, the treatment was cancelled (n=13) or discontinued  
10  
11 (n=11) in 24 patients (20.0%), due to poor general condition (n=14), acute complications  
12  
13 (n=7), or patient preferences (n=3).  
14  
15  
16  
17

18 Chemoradiotherapy (CRT) according to the Stupp protocol was prepared or  
19  
20 commenced in 185 patients, whereas the treatment plan was changed or prematurely  
21  
22 interrupted in 28 of these (15.1%). Consequently, 157 patients (43.3% of the total cohort)  
23  
24 received CRT according to the Stupp protocol. Nine of the 11 patients receiving CRT  
25  
26 according to the Stupp protocol, despite the lack of histological confirmation, had deep-seated  
27  
28 tumours. In patients receiving adjuvant Tmz, regardless of radiation therapy dose, the mean  
29  
30 number of Tmz courses was 4.6 (range 1-14). Nine of the patients who underwent resection  
31  
32 were not eligible for CRT, due to complications, rapid progression, or poor general condition.  
33  
34 Among 236 patients aged under 70 years, 144 (61.0%) received CRT according to the Stupp  
35  
36 protocol, 85 patients (36.0%) received less intensive CRT, and 7 patients (3.0%) received best  
37  
38 supportive care. In the cohort of 127 patients aged over 70 years, 13 (10.2%) received CRT  
39  
40 according to the Stupp protocol, 82 patients (64.6%) received less intensive CRT, and 32  
41  
42 patients (25.2%) received best supportive care.  
43  
44  
45  
46  
47  
48

49 [Figure 1 near here]  
50  
51

52 Associations between patient and tumour characteristics and treatment approach are  
53  
54 presented in table 2. Elderly patients, patients with multifocal or deep-seated tumour, and  
55  
56 patients with tumour invasion of the corpus callosum were less likely to undergo surgical  
57  
58 resection. Elderly patients, patients with cognitive impairment, and patients with tumour  
59  
60

invading the corpus callosum were less likely to receive CRT according to the Stupp protocol.

**Table 2. Associations between patient and tumour characteristics and treatment approach in 363 patients diagnosed with glioblastoma between January 2007 and December 2014.**

|                                        | No resection |               | CRT less intensive than Stupp protocol <sup>†</sup> |               |             |               |             |               |
|----------------------------------------|--------------|---------------|-----------------------------------------------------|---------------|-------------|---------------|-------------|---------------|
|                                        | Unadjusted   |               | Adjusted                                            |               | Unadjusted  |               | Adjusted    |               |
|                                        | OR           | (95% CI)      | OR                                                  | (95% CI)      | OR          | (95% CI)      | OR          | (95% CI)      |
| Male gender                            | 0.9          | (0.6-1.4)     | 1.1                                                 | (0.6-1.9)     | <b>0.6</b>  | (0.4-0.9)*    | 0.6         | (0.4-1.0)     |
| Age ≥70 years                          | <b>4.5</b>   | (2.9-7.2)***  | <b>6.1</b>                                          | (3.3-11.1)*** | <b>13.7</b> | (7.3-25.8)*** | <b>12.9</b> | (6.5-26.0)*** |
| Cognitive impairment                   | 1.2          | (0.8-1.8)     | 1.1                                                 | (0.7-1.9)     | <b>1.8</b>  | (0.6-1.7)**   | <b>1.8</b>  | (1.1-3.1)*    |
| Charlson comorbidity score ≥7          | <b>4.5</b>   | (2.2-9.1)***  | 2.1                                                 | (0.9-4.9)     | <b>11.6</b> | (3.5-38.4)*** | 2.9         | (0.8-11.1)    |
| Multifocal tumour                      | <b>1.9</b>   | (1.2-3.1)**   | <b>2.7</b>                                          | (1.5-4.9)*    | 1.2         | (0.7-1.9)     | 1.7         | (0.9-3.0)     |
| Deep seated tumour <sup>‡</sup>        | <b>7.3</b>   | (3.5-15.3)*** | <b>9.4</b>                                          | (4.0-21.7)*** | 1.4         | (0.7-2.6)     | 1.2         | (0.6-2.6)     |
| Tumour invasion of the corpus callosum | <b>3.7</b>   | (2.3-6.0)***  | <b>5.0</b>                                          | (2.8-8.9)***  | <b>2.3</b>  | (1.4-3.8)**   | <b>2.8</b>  | (1.6-5.0)***  |

OR, 95% CI and p-values calculated by binomial logistic regression. No resection (=1) compared to resection (=0). No CRT or less-intensive CRT (=1) compared to Stupp protocol (=0).

Two-sided p-values <0.05 were considered statistical significant; \*p<0.05; \*\*p<0.01; \*\*\*p<0.001; p-values not marked by an asterisk are not significant.

<sup>†</sup> Stupp protocol = Radiation therapy 60 Gy in 2 Gy fractions (delivered), fulfilled concomitant Tmz, and fulfilled at least one out of six planned Tmz monotherapy courses

<sup>‡</sup> Thalamus, basal ganglia, internal capsule, splenium corpus callosum, mesencephalon, brain stem, and cerebellum.

CI=confidence interval; CRT=chemoradiotherapy; Gy=Gray; OR=odds ratio.

In total 188 patients (51.8%) had at least one epileptic seizure, the majority at the time of diagnosis. Venous thromboembolism (deep venous thrombosis of extremity, pulmonary embolism, or sinus vein thrombosis) occurred in 75 patients (20.7%), while 26 patients (7.2%) were diagnosed with osteoporosis. Among 247 patients receiving initial chemotherapy, CTCAE grade 3-4 bone marrow suppression, i.e. platelet count < 50.0 x 10<sup>9</sup>/L and/or neutrophil count <1.0 x 10<sup>9</sup>/L, occurred in 37 patients (15.0%). Fifty-eight patients (23.5%) had bacterial or viral infections, while 11 patients (4.5%) experienced septicaemia or neutropenic fever.

## Survival

Median overall survival was 10.2 months (95% CI 9.1-11.3 months). One-year, two-year, three-year and five-year survival rates were 41.3%, 17.3%, 9.1% and 4.1%, respectively.

Kaplan Meier curves on median survival according to age, surgery and CRT are presented in figure 2. Median survival in patients aged under 70 years was 13.5 months (95% CI 12.1-14.9), compared to 5.2 months (95% CI 4.1-6.3) in patients aged over 70 years. Median survival in patients undergone resection was 13.7 months (95% CI 12.1-15.4), compared to 8.3 months (95% CI 6.6-9.9) and 4.5 months (95% CI 4.0-5.1) in patients undergone biopsy or no surgical intervention, respectively. Median survival in patients receiving CRT according to the Stupp protocol was 16.3 months (95% CI 14.1-18.5), compared to 7.9 months (95% CI 6.7-9.0) and 2.0 months (95% CI 0.9-3.2) in patients treated with less intensive CRT or best supportive care, respectively. In patients aged over 70 years and receiving CRT according to the Stupp protocol, median survival was 21.4 months (95% CI 7.5-35.3), compared to 6.0 months (95% CI 4.7-7.7) and 2.0 months (95% CI 0.7-3.4) in those treated with less intensive CRT or best supportive care. Among 157 patients receiving CRT according to the Stupp protocol, 49 patients (31.2%) survived for longer than two years, and 14 patients (8.9%) survived for more than five years.

[Figure 2 near here]

An alluvial diagram visualizes the consecutive treatment modalities and the association with median survival (figure 3). In the total cohort, 15 patients (4.1%) achieved long-term survival of more than five years. Twelve of these patients underwent surgical resection, whereas three had a biopsy alone. Moreover, 14 out of 15 long-term surviving patients completed the Stupp protocol, while one patient received hypofractionated radiation therapy followed by Tmz monotherapy. All 15 long-term surviving patients completed at least six maintenance Tmz courses (range six to nine).

1  
2  
3 [Figure 3 near here]  
4  
5  
6  
7

## 8 **DISCUSSION**

9  
10 Median overall survival in our cohort of 363 consecutive patients diagnosed with  
11 glioblastoma was approximately 10 months. Surgical resection and full-course  
12 chemoradiotherapy (CRT) were strongly associated with improved survival. However, only  
13 two thirds of the patients underwent resection, and less than half of the patients received CRT  
14 according to the Stupp protocol. Both those aged over and those aged under 70 years, and  
15 who received treatment according to the Stupp protocol, had a favourable prognosis with a  
16 median survival and long-term survival rates as seen in clinical trials. Survival was  
17 considerable worse in elderly patients and patients receiving less intensive treatment. A  
18 significant number of patients received best supportive care, thus the survival was poorer in  
19 this population-based study compared to results from clinical trials.  
20  
21  
22  
23  
24  
25  
26  
27  
28  
29  
30  
31  
32

33 Histological confirmation of the diagnosis was lacking in approximately 25% of the  
34 patients in our cohort. There are limited real-world data describing the frequency of omitting  
35 biopsy in patients with highly suspected GBM according to MRI. A previous Norwegian  
36 study reported that 12% of the patients diagnosed with GBM had the diagnosis based solely  
37 on radiological pattern or autopsy.<sup>19</sup> Conversely, an English population-based study reported  
38 that less than 10% of patients aged under 70 years, and 40% of patients aged over 70 years,  
39 lacked histological confirmation of the diagnosis, comparable to our result.<sup>20</sup> We found that  
40 patients with MRI-based diagnosis were older and had a higher comorbidity burden, and they  
41 had more often deep-seated tumours. In addition, they more often presented with dizziness  
42 and gait disturbances, which are vague and often slowly progressing symptoms that may have  
43 led to a delay in diagnosis compared to patients presenting with epileptic seizure or headache.  
44  
45  
46  
47  
48  
49  
50  
51  
52  
53  
54  
55  
56  
57  
58  
59  
60  
60 It is likely to assume that established experiences and traditions among clinicians may



1  
2  
3 influence the choice of intervention, e.g. emphasizing the risk of complications related to  
4 neurosurgery in elderly or frail patients, and patients with deep-seated tumours. The dismal  
5 prognosis of patients not undergoing resection is another possible contributing factor to the  
6 choice of this diagnostic approach. A further reason may be the improvement of MRI  
7 techniques, including perfusion-weighted imaging and diffusion-weighted MRI, facilitating  
8 the distinction of GBM from other intracranial lesions.<sup>21 22</sup> However, in order to increase the  
9 diagnostic accuracy, biopsy should also be recommended in patients considered not to benefit  
10 from resection, when considered feasible and safe.

11  
12  
13  
14  
15  
16  
17  
18  
19  
20  
21 Surgical resection was performed in 61% of the patients in this cohort, in line with the  
22 above mentioned study from England.<sup>20</sup> However, the resection rate was lower than reported  
23 in other previous population-based studies, where 74% of patients underwent resection.<sup>3 18</sup> A  
24 possible explanation is our inclusion of patients with MRI-based GBM diagnosis, with a  
25 higher number of patients with deep-seated tumours and tumours invading the corpus  
26 callosum. Patients who underwent resection had a significant better survival than those who  
27 underwent biopsy or no surgical intervention.

28  
29  
30  
31  
32  
33  
34  
35  
36  
37  
38 Nearly 90% of the patients in our cohort received radiotherapy, the majority in  
39 combination with Tmz. However, less than half of the patients received CRT according to the  
40 Stupp protocol, similar to the findings of Lwin and colleagues.<sup>18</sup> We assume that the  
41 frequency of elderly patients, patients with a significant comorbidity burden, and patients with  
42 extensive symptoms including cognitive impairment influence the choice of therapeutic  
43 intensity, and the capability for patients to complete commenced treatment. Patients aged over  
44 70 years received less intensive treatment compared to younger patients, in concordance with  
45 previous studies of elderly patients with GBM.<sup>3 13 14 20</sup>

46  
47  
48  
49  
50  
51  
52  
53  
54  
55  
56  
57  
58  
59  
60  
Median overall survival in our cohort was approximately 10 months. This is  
comparable with results from previous population-based studies after the implementation of

1  
2  
3 the Stupp protocol, where median survival ranged from 6.1 to 15.3 months.<sup>3 18-20 23 24</sup> A recent  
4  
5 systematic review reported a median overall survival of 15.6 months after implementation of  
6  
7 combined CRT.<sup>25</sup> However, nearly one third of the studies included in this review were  
8  
9 clinical trials, with an expected superiority in survival rates compared to population-based  
10  
11 materials. In our cohort, five-year survival rate was approximately 4%, equal to that reported  
12  
13 in large population-based materials.<sup>1 20</sup> Survival was considerable better in patients receiving  
14  
15 CRT according to the Stupp protocol, with a median survival of approximately 16 months and  
16  
17 a five-year survival rate of 8.9%, similar to the results from previous population-based  
18  
19 studies.<sup>3 18 19</sup> These survival rates are also in line with the results from the randomized clinical  
20  
21 trial by Stupp and colleagues, where median survival in the CRT arm was 14.6 months, and  
22  
23 five-year survival was 9.8%.<sup>8 26</sup> Our results highlight the gap between the survival rates  
24  
25 reported from clinical studies and those observed in a real-world setting.  
26  
27  
28  
29

30  
31 Median overall survival in patients aged over 70 years was 5.2 months in our cohort,  
32  
33 in line with previous population-based studies where median survival ranged from less than  
34  
35 three to four months.<sup>13 14 16 20</sup> Survival in elderly patients in our cohort was strongly associated  
36  
37 with CRT treatment approach, and ranged from two months in patients receiving best  
38  
39 supportive care to 21 months in patients receiving CRT according to the Stupp protocol. This  
40  
41 was comparable to results from previous population-based studies on elderly patients.<sup>3 27</sup> As  
42  
43 expected, median overall survival in elderly patients was lower in our unselected cohort than  
44  
45 demonstrated in prospective clinical trials, where median survival ranged from 5.2 months to  
46  
47 9.6 months depending on CRT.<sup>9-11 15</sup> A recent Cochrane analysis concluded that CRT  
48  
49 improved survival compared to radiation therapy alone in elderly patients capable of self-  
50  
51 caring.<sup>28</sup> The improved survival in elderly patients receiving combined CRT, both in our  
52  
53 cohort and previous studies, demonstrates a potential benefit from intensive treatment in this  
54  
55 group.<sup>3 10 27 29</sup> A disregard of this issue may cause a potential risk of undertreating elderly  
56  
57  
58  
59  
60

1  
2  
3 patients. Nevertheless, in patients of advanced age or suffering from extensive disabilities,  
4  
5 best supportive care may be an appropriate approach.  
6  
7

8  
9 As concerns the methodology of our study, we find that the population-based design is  
10 a strength. The long-term follow-up of an unselected cohort provide knowledge on treatment  
11 and survival of GBM, including the establishment of long-term survival rates, and the  
12 inclusion period ensured that all included patients were diagnosed with GBM after the  
13 implementation of the current standard treatment. Other strengths were the low dropout rate  
14 of only one patient (0.3%), and the detailed clinical information on treatment and  
15 complications available in all patients, within a common patient record system throughout the  
16 region. Among the limitations of the study was the lack of molecular analyses. Further,  
17 performance status was not sufficiently described in medical records and not applicable to  
18 validated screening tools. To counteract this, comorbidity burden, cognitive impairment and  
19 gait dysfunction were included in the analyses. In addition, surgical resection was not  
20 classified into degree of resection; hence, the survival curves do not differentiated between  
21 macroscopic complete and partial resection. The inclusion of patients with MRI-based  
22 diagnosis can be considered both a disadvantage and an advantage. To reduce the risk of  
23 incorrect inclusion of non-GBM patients, we included only patients when clinicians and  
24 radiologists unequivocally considered GBM the most likely diagnosis. Even though biopsy is  
25 highly recommended and standard of care, it is not always considered feasible and safe.  
26 Therefore, the inclusion of these patients provides knowledge on the diagnostic approach and  
27 survival of all patients with highly suspected GBM based on MRI.  
28  
29  
30  
31  
32  
33  
34  
35  
36  
37  
38  
39  
40  
41  
42  
43  
44  
45  
46  
47  
48  
49  
50  
51

52 In conclusion, the prognosis of GBM was considerably worse in a real-world setting  
53 compared to results from clinical trials. In patients receiving treatment according to the Stupp  
54 protocol, survival rates were comparable to that achieved in clinical trials. However, only two  
55 thirds of the patients in our cohort underwent resection, and less than half of the patients  
56  
57  
58  
59  
60

1  
2  
3 received treatment according to the Stupp protocol. Our results point towards a risk of  
4  
5 undertreating patients with GBM, and a potential benefit from choosing a more aggressive  
6  
7 treatment approach.  
8  
9

### 10 **Funding statement**

11  
12  
13 This research received no specific grant from any funding agency in the public, commercial or  
14  
15 non-for-profit sectors.  
16  
17

### 18 **Disclosure of interest**

19  
20  
21 The authors report no conflicts of interest.  
22  
23

### 24 **Acknowledgements**

25  
26  
27 The authors would like to thank Anastasia Ushakova at Stavanger University Hospital for  
28  
29 support in statistical analyses.  
30  
31

### 32 **Contributors**

33  
34 LSB, OF and EF initiated the study and were responsible for study design and data collecting.  
35  
36 LSB was responsible for statistical analyses, contributed by OF, BG, RM and EF, with  
37  
38 support from statistician AU. All co-authors participated in the interpretation of the results.  
39  
40 LSB and OF designed the figures. LSB drafted the initial manuscript, and all co-authors  
41  
42 reviewed and edited the paper.  
43  
44  
45

### 46 **Data sharing**

47  
48  
49 Deidentified participant data are prohibited from distribution.  
50  
51

### 52 **References**

- 53  
54  
55 1. Ostrom QT, Gittleman H, Truitt G, et al. CBTRUS Statistical Report: Primary Brain and Other Central  
56  
57 Nervous System Tumors Diagnosed in the United States in 2011-2015. *Neuro-oncology*  
58  
59 2018;20(suppl\_4):iv1-iv86. doi: 10.1093/neuonc/noy131 [published Online First: 2018/11/18]  
60

- 1
  - 2
  - 3
  - 4
  - 5
  - 6
  - 7
  - 8
  - 9
  - 10
  - 11
  - 12
  - 13
  - 14
  - 15
  - 16
  - 17
  - 18
  - 19
  - 20
  - 21
  - 22
  - 23
  - 24
  - 25
  - 26
  - 27
  - 28
  - 29
  - 30
  - 31
  - 32
  - 33
  - 34
  - 35
  - 36
  - 37
  - 38
  - 39
  - 40
  - 41
  - 42
  - 43
  - 44
  - 45
  - 46
  - 47
  - 48
  - 49
  - 50
  - 51
  - 52
  - 53
  - 54
  - 55
  - 56
  - 57
  - 58
  - 59
  - 60
2. Wen PY, Huse JT. 2016 World Health Organization Classification of Central Nervous System Tumors. *Continuum (Minneapolis, Minn)* 2017;23(6, Neuro-oncology):1531-47. doi: 10.1212/con.0000000000000536 [published Online First: 2017/12/05]
3. Hansen S, Rasmussen BK, Laursen RJ, et al. Treatment and survival of glioblastoma patients in Denmark: The Danish Neuro-Oncology Registry 2009-2014. *Journal of neuro-oncology* 2018 doi: 10.1007/s11060-018-2892-7 [published Online First: 2018/05/14]
4. Weller M, van den Bent M, Hopkins K, et al. EANO guideline for the diagnosis and treatment of anaplastic gliomas and glioblastoma. *The Lancet Oncology* 2014;15(9):e395-e403. doi: [https://doi.org/10.1016/S1470-2045\(14\)70011-7](https://doi.org/10.1016/S1470-2045(14)70011-7)
5. Saini J, Kumar Gupta P, Awasthi A, et al. Multiparametric imaging-based differentiation of lymphoma and glioblastoma: using T1-perfusion, diffusion, and susceptibility-weighted MRI. *Clinical Radiology* 2018;73(11) doi: 10.1016/j.crad.2018.07.107
6. Suh CH, Kim HS, Jung SC, et al. Perfusion MRI as a diagnostic biomarker for differentiating glioma from brain metastasis: a systematic review and meta-analysis. *European radiology* 2018;28(9):3819-31. doi: 10.1007/s00330-018-5335-0 [published Online First: 2018/04/06]
7. Sulman EP, Ismaila N, Armstrong TS, et al. Radiation Therapy for Glioblastoma: American Society of Clinical Oncology Clinical Practice Guideline Endorsement of the American Society for Radiation Oncology Guideline. *Journal of clinical oncology : official journal of the American Society of Clinical Oncology* 2017;35(3):361-69. doi: 10.1200/jco.2016.70.7562 [published Online First: 2016/11/29]
8. Stupp R, Mason WP, van den Bent MJ, et al. Radiotherapy plus Concomitant and Adjuvant Temozolomide for Glioblastoma. *New England Journal of Medicine* 2005;352(10):987-96. doi: doi:10.1056/NEJMoa043330
9. Malmstrom A, Gronberg BH, Marosi C, et al. Temozolomide versus standard 6-week radiotherapy versus hypofractionated radiotherapy in patients older than 60 years with glioblastoma: the Nordic randomised, phase 3 trial. *The Lancet Oncology* 2012;13(9):916-26. doi: 10.1016/s1470-2045(12)70265-6 [published Online First: 2012/08/11]
10. Perry JR, Laperriere N, O'Callaghan CJ, et al. Short-Course Radiation plus Temozolomide in Elderly Patients with Glioblastoma. *N Engl J Med* 2017;376(11):1027-37. doi: 10.1056/NEJMoa1611977 [published Online First: 2017/03/16]
11. Wick W, Platten M, Meisner C, et al. Temozolomide chemotherapy alone versus radiotherapy alone for malignant astrocytoma in the elderly: the NOA-08 randomised, phase 3 trial. *The Lancet Oncology* 2012;13(7):707-15. doi: 10.1016/s1470-2045(12)70164-x [published Online First: 2012/05/15]
12. Statistics Norway. 2020:Population and area (M) 2007-20.
13. Coate L, McNamara MG, Lwin Z, et al. Glioblastoma treatment in the elderly in the temozolomide therapy era. *The Canadian journal of neurological sciences Le journal canadien des sciences neurologiques* 2014;41(3):357-62. doi: 10.1017/s0317167100017303 [published Online First: 2014/04/11]
14. Gately L, Collins A, Murphy M, et al. Age alone is not a predictor for survival in glioblastoma. *Journal of neuro-oncology* 2016;129(3):479-85. doi: 10.1007/s11060-016-2194-x
15. Minniti G, De Sanctis V, Muni R, et al. Hypofractionated radiotherapy followed by adjuvant chemotherapy with temozolomide in elderly patients with glioblastoma. *Journal of neuro-oncology* 2009;91(1):95-100. doi: 10.1007/s11060-008-9689-z
16. Pretanvil J-A, Salinas IQ, Piccioni DE. Glioblastoma in the elderly: treatment patterns and survival. *CNS oncology* 2017;6(1):19-28. doi: 10.2217/cns-2016-0023 [published Online First: 2016/12/21]
17. Charlson M, Szatrowski TP, Peterson J, et al. Validation of a combined comorbidity index. *Journal of clinical epidemiology* 1994;47(11):1245-51. doi: [https://doi.org/10.1016/0895-4356\(94\)90129-5](https://doi.org/10.1016/0895-4356(94)90129-5)

18. Lwin Z, MacFadden D, Al-Zahrani A, et al. Glioblastoma management in the temozolomide era: have we improved outcome? *Journal of neuro-oncology* 2013;115(2):303-10. doi: 10.1007/s11060-013-1230-3 [published Online First: 2013/08/28]
19. Ronning PA, Helseth E, Meling TR, et al. A population-based study on the effect of temozolomide in the treatment of glioblastoma multiforme. *Neuro-oncology* 2012;14(9):1178-84. doi: 10.1093/neuonc/nos153 [published Online First: 2012/08/08]
20. Brodbelt A, Greenberg D, Winters T, et al. Glioblastoma in England: 2007–2011. *European Journal of Cancer* 2015;51(4):533-42. doi: <https://doi.org/10.1016/j.ejca.2014.12.014>
21. Chiang IC, Kuo Y-T, Lu C-Y, et al. Distinction between high-grade gliomas and solitary metastases using peritumoral 3-T magnetic resonance spectroscopy, diffusion, and perfusion imagings. *Neuroradiology* 2004;46(8):619-27. doi: 10.1007/s00234-004-1246-7
22. Radbruch A, Wiestler B, Kramp L, et al. Differentiation of glioblastoma and primary CNS lymphomas using susceptibility weighted imaging. *European journal of radiology* 2013;82(3):552-6. doi: 10.1016/j.ejrad.2012.11.002 [published Online First: 2012/12/15]
23. Teo M, Martin S, Owusu-Agyemang K, et al. A survival analysis of GBM patients in the West of Scotland pre- and post-introduction of the Stupp regime. *British journal of neurosurgery* 2014;28(3):351-5. doi: 10.3109/02688697.2013.847170 [published Online First: 2013/10/12]
24. Bruhn H, Strandéus M, Milos P, et al. Improved survival of Swedish glioblastoma patients treated according to Stupp. 2018;138(4):332-37. doi: 10.1111/ane.12966
25. Marenco-Hillebrand L, Wijesekera O, Suarez-Meade P, et al. Trends in glioblastoma: outcomes over time and type of intervention: a systematic evidence based analysis. *Journal of neuro-oncology* 2020 doi: 10.1007/s11060-020-03451-6 [published Online First: 2020/03/12]
26. Stupp R, Hegi ME, Mason WP, et al. Effects of radiotherapy with concomitant and adjuvant temozolomide versus radiotherapy alone on survival in glioblastoma in a randomised phase III study: 5-year analysis of the EORTC-NCIC trial. *The Lancet Oncology* 2009;10(5):459-66. doi: 10.1016/s1470-2045(09)70025-7 [published Online First: 2009/03/10]
27. Rusthoven CG, Koshy M, Sher DJ, et al. Combined-Modality Therapy With Radiation and Chemotherapy for Elderly Patients With Glioblastoma in the Temozolomide Era: A National Cancer Database Analysis. *JAMA neurology* 2016;73(7):821-28. doi: 10.1001/jamaneurol.2016.0839 %J JAMA Neurology
28. Hanna C, Lawrie TA, Rogozinska E, et al. Treatment of newly diagnosed glioblastoma in the elderly: a network meta-analysis. *Cochrane Database Syst Rev* 2020;3:CD013261. doi: 10.1002/14651858.CD013261.pub2 [published Online First: 2020/03/24]
29. Youssef M, Ludmir EB, Mandel JJ, et al. Treatment strategies for glioblastoma in older patients: age is just a number. *Journal of neuro-oncology* 2019;145(2):357-64. doi: 10.1007/s11060-019-03304-x

**FIGURE LEGENDS:****Figure 1. Treatment approach in a population-based cohort diagnosed with glioblastoma between January 2007 and December 2014.**

Median age (range) and median survival (95% CI) in the respective treatment groups.

\*RT delivered 60 Gy in 2 Gy fractions (n=152) and optionally additional boost (n=5), concomitant Tmz throughout the entire RT period, and completed at least one of six planned monotherapy Temozolomide courses. †60 Gy delivered (n=45) and additional boost (n=2). ‡39 Gy in 3 Gy fractions (n=85); 20 Gy in 4 Gy fractions (n=1); stereotactic radiosurgery (n=2); whole brain RT 30-36 Gy in 3 Gy fractions (n=9); 50-54 Gy in 2 Gy fractions (n=3); 40.05 Gy in 2.67 Gy fractions (n=1); discontinued 60 Gy or hypofractionated regimens (n=18).

CRT=chemoradiotherapy; RT=radiation therapy; Gy=Gray; Tmz=Temozolomide; SD=Standard deviation; CI=Confidence Interval

**Figure 2. Overall survival in 363 adults diagnosed with glioblastoma between January 2007 and December 2014.**

a) Survival by age. b) Survival by surgical treatment. c) Survival by chemoradiotherapy. d) Survival by chemoradiotherapy in patients aged 70 years or older.

Stupp protocol is here defined as completed radiation therapy in total dose of 60 Gy in 2 Gy fractions, concomitant Temozolomide in the entire radiation therapy period, and completed at least one out six planned Temozolomide monotherapy courses. Cumulative survival in months with 95% Confidence Interval (CI) bands. Groups compared with log rank test.



1  
2  
3 **Figure 3. Alluvial diagram visualising associations between combination of treatment**  
4 **modalities and median survival in an unselected cohort of 363 patients diagnosed with**  
5 **glioblastoma between January 2007 and December 2014.**  
6  
7  
8  
9

10 The width of the curves represents the absolute number of patients. The colours of the curves  
11 correspond to median survival in months.  
12  
13  
14  
15  
16  
17  
18  
19  
20  
21  
22  
23  
24  
25  
26  
27  
28  
29  
30  
31  
32  
33  
34  
35  
36  
37  
38  
39  
40  
41  
42  
43  
44  
45  
46  
47  
48  
49  
50  
51  
52  
53  
54  
55  
56  
57  
58  
59  
60

For peer review only



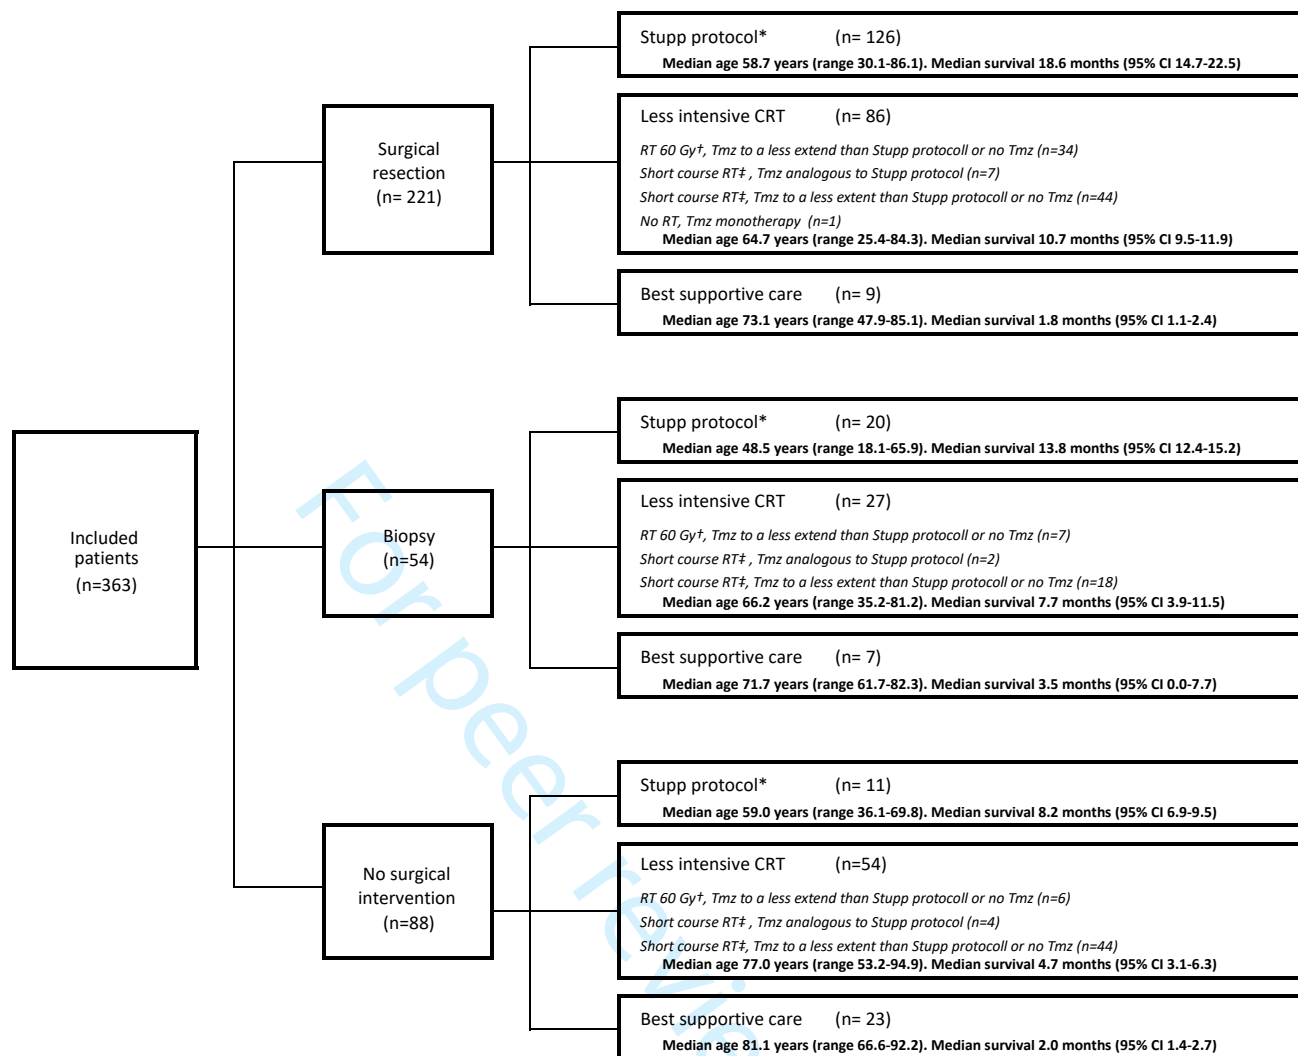

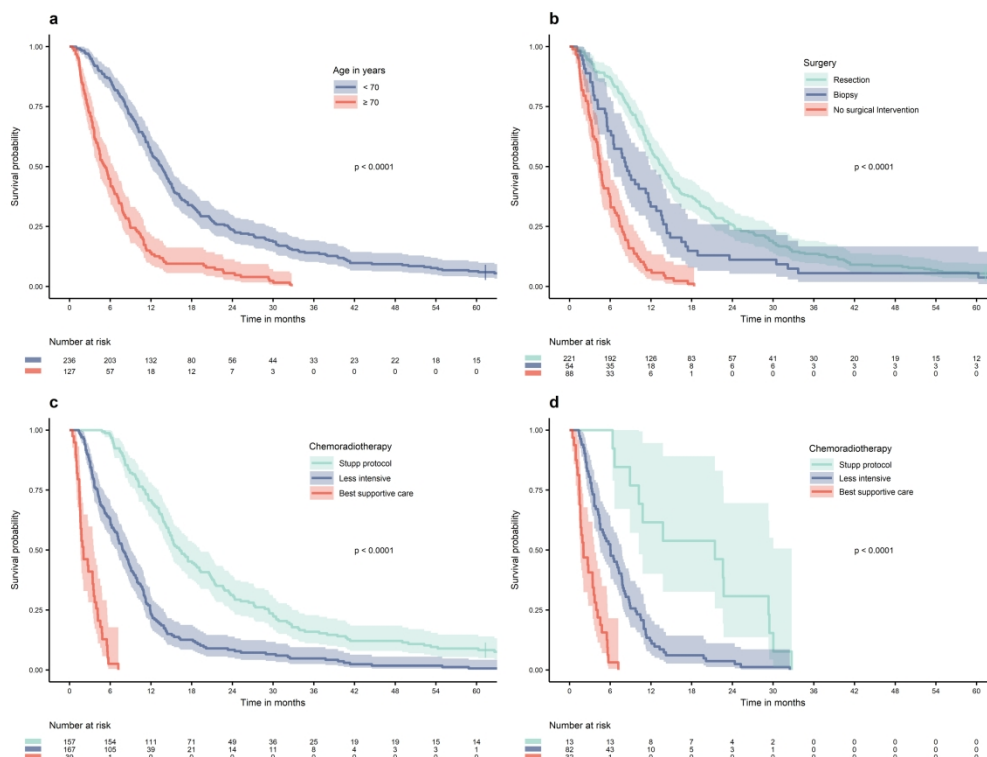

Figure 2. Overall survival in 363 adults diagnosed with glioblastoma between January 2007 and December 2014.

299x229mm (300 x 300 DPI)

1  
2  
3  
4  
5  
6  
7  
8  
9  
10  
11  
12  
13  
14  
15  
16  
17  
18  
19  
20  
21  
22  
23  
24  
25  
26  
27  
28  
29  
30  
31  
32  
33  
34  
35  
36  
37  
38  
39  
40  
41  
42  
43  
44  
45  
46  
47  
48  
49  
50  
51  
52  
53  
54  
55  
56  
57  
58  
59  
60

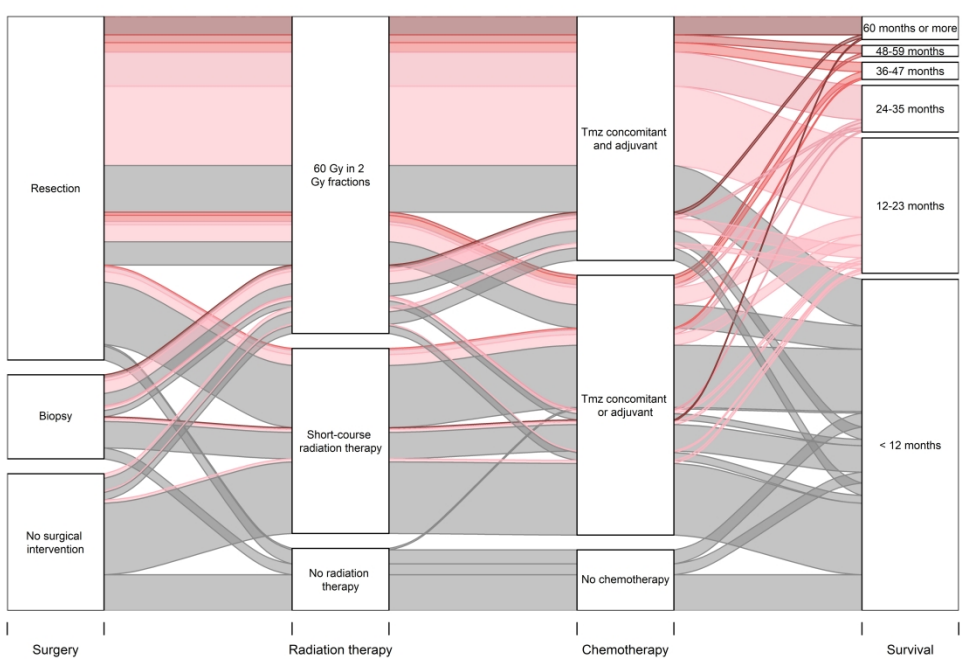

Figure 3. Alluvial diagram visualising associations between combination of treatment modalities and median survival in an unselected cohort of 363 patients diagnosed with glioblastoma between January 2007 and December 2014.

209x139mm (600 x 600 DPI)

# BMJ Open

## Treatment approach and survival from glioblastoma: results from a population-based retrospective cohort study from Western Norway

|                                 |                                                                                                                                                                                                                                                                                                                                                                                                                                                                                                                                                                                                                                                                                                                                                                                                                                                                            |
|---------------------------------|----------------------------------------------------------------------------------------------------------------------------------------------------------------------------------------------------------------------------------------------------------------------------------------------------------------------------------------------------------------------------------------------------------------------------------------------------------------------------------------------------------------------------------------------------------------------------------------------------------------------------------------------------------------------------------------------------------------------------------------------------------------------------------------------------------------------------------------------------------------------------|
| Journal:                        | <i>BMJ Open</i>                                                                                                                                                                                                                                                                                                                                                                                                                                                                                                                                                                                                                                                                                                                                                                                                                                                            |
| Manuscript ID                   | bmjopen-2020-043208.R1                                                                                                                                                                                                                                                                                                                                                                                                                                                                                                                                                                                                                                                                                                                                                                                                                                                     |
| Article Type:                   | Original research                                                                                                                                                                                                                                                                                                                                                                                                                                                                                                                                                                                                                                                                                                                                                                                                                                                          |
| Date Submitted by the Author:   | 23-Dec-2020                                                                                                                                                                                                                                                                                                                                                                                                                                                                                                                                                                                                                                                                                                                                                                                                                                                                |
| Complete List of Authors:       | Bjorland, Line; Stavanger University Hospital, Department of Oncology; University of Bergen Faculty of Medicine and Dentistry, Department of Clinical Medicine<br>Fluge, Oystein; Haukeland Universitetssjukehus, Department of Oncology and Medical Physics; University of Bergen Faculty of Medicine and Dentistry, Department of Clinical Science<br>Gilje, Bjornar; Stavanger University Hospital, Department of Oncology; University of Bergen Faculty of Medicine and Dentistry, Department of Clinical Medicine<br>Mahesparan, Rupavathana; Haukeland University Hospital, Department of Neurosurgery; University of Bergen Faculty of Medicine and Dentistry, Department of Clinical Medicine<br>Farbu, Elisabeth; Stavanger University Hospital, Department of Neurology; University of Bergen Faculty of Medicine and Dentistry, Department of Clinical Medicine |
| <b>Primary Subject Heading</b>: | Oncology                                                                                                                                                                                                                                                                                                                                                                                                                                                                                                                                                                                                                                                                                                                                                                                                                                                                   |
| Secondary Subject Heading:      | Neurology                                                                                                                                                                                                                                                                                                                                                                                                                                                                                                                                                                                                                                                                                                                                                                                                                                                                  |
| Keywords:                       | Neurological oncology < ONCOLOGY, CHEMOTHERAPY, Adult oncology < ONCOLOGY, Radiation oncology < RADIOTHERAPY                                                                                                                                                                                                                                                                                                                                                                                                                                                                                                                                                                                                                                                                                                                                                               |
|                                 |                                                                                                                                                                                                                                                                                                                                                                                                                                                                                                                                                                                                                                                                                                                                                                                                                                                                            |

SCHOLARONE™  
Manuscripts



I, the Submitting Author has the right to grant and does grant on behalf of all authors of the Work (as defined in the below author licence), an exclusive licence and/or a non-exclusive licence for contributions from authors who are: i) UK Crown employees; ii) where BMJ has agreed a CC-BY licence shall apply, and/or iii) in accordance with the terms applicable for US Federal Government officers or employees acting as part of their official duties; on a worldwide, perpetual, irrevocable, royalty-free basis to BMJ Publishing Group Ltd ("BMJ") its licensees and where the relevant Journal is co-owned by BMJ to the co-owners of the Journal, to publish the Work in this journal and any other BMJ products and to exploit all rights, as set out in our [licence](#).

The Submitting Author accepts and understands that any supply made under these terms is made by BMJ to the Submitting Author unless you are acting as an employee on behalf of your employer or a postgraduate student of an affiliated institution which is paying any applicable article publishing charge ("APC") for Open Access articles. Where the Submitting Author wishes to make the Work available on an Open Access basis (and intends to pay the relevant APC), the terms of reuse of such Open Access shall be governed by a Creative Commons licence – details of these licences and which [Creative Commons](#) licence will apply to this Work are set out in our licence referred to above.

Other than as permitted in any relevant BMJ Author's Self Archiving Policies, I confirm this Work has not been accepted for publication elsewhere, is not being considered for publication elsewhere and does not duplicate material already published. I confirm all authors consent to publication of this Work and authorise the granting of this licence.

1  
2  
3 **Treatment approach and survival from glioblastoma: results from a**  
4 **population-based retrospective cohort study from Western Norway**  
5  
6  
7

8 Line Sagerup Bjorland<sup>a,b</sup>, Øystein Fluge<sup>c,d</sup>, Bjørnar Gilje<sup>a</sup>, Rupavathana  
9 Mahesparan<sup>b,e</sup> and Elisabeth Farbu<sup>b,f</sup>  
10  
11

12  
13 *<sup>a</sup>Department of Oncology, Stavanger University Hospital, Norway; <sup>b</sup>Department of Clinical*  
14 *Medicine, University of Bergen, Norway; <sup>c</sup>Department of Oncology and Medical Physics,*  
15 *Haukeland University Hospital, Bergen, Norway; <sup>d</sup>Department of Clinical Science, University*  
16 *of Bergen, Norway; <sup>e</sup>Department of Neurosurgery, Haukeland University Hospital, Bergen,*  
17 *Norway; <sup>f</sup>Department of Neurology, Stavanger University Hospital, Norway*  
18  
19  
20  
21  
22

23 **Corresponding author:**

24 Line Sagerup Bjorland, M.D.  
25 Department of Oncology  
26 Stavanger University Hospital  
27 PO box 8100  
28 N-4068 Stavanger, Norway  
29 E-mail: [line.bjorland@sus.no](mailto:line.bjorland@sus.no)  
30 Telephone: +47 480 77 024  
31  
32  
33  
34  
35  
36  
37  
38  
39  
40  
41

42 **Key words:** neurological oncology; chemotherapy; radiotherapy; adult oncology.  
43  
44

45 **Word count:** 3453 words  
46  
47  
48  
49  
50  
51  
52  
53  
54  
55  
56  
57  
58  
59  
60

**ABSTRACT**

**Objectives:** To evaluate treatment and survival from glioblastoma in a real-world setting.

**Design and settings:** A population-based retrospective cohort study from Western Norway.

**Participants:** 363 patients aged 18 years or older diagnosed with glioblastoma between 1/1/2007 and 31/12/2014.

**Primary and secondary outcome measures:** Overall survival and survival rates determined by Kaplan Meier method, groups compared by log rank test. Associations between clinical characteristics and treatment approach assessed by logistic regression. Associations between treatment approach and outcome analysed by Cox regression.

**Results:** Median overall survival was 10.2 months (95% CI 9.1-11.3). Resection was performed in 221 patients (60.9%), and was inversely associated with age over 70 years, higher comorbidity burden, deep-seated tumour localisation, and multifocality. Median survival was 13.7 months (95% CI 12.1-15.4) in patients undergoing tumour resection, 8.3 months (95% CI 6.6-9.9) in patients undergoing biopsy, and 4.5 months (95% CI 4.0-5.1) in patients where no surgical intervention was performed. Chemoradiotherapy according to the Stupp protocol was given to 157 patients (43%). Age over 70 years, higher comorbidity burden, and cognitive impairment were associated with less intensive chemoradiotherapy. Median survival was 16.3 months (95% CI 14.1-

1  
2  
3 18.5), 7.9 months (95% CI 6.7-9.0), and 2.0 months (95% CI 0.9-3.2) in patients  
4  
5 treated according to the Stupp protocol, with less intensive chemoradiotherapy  
6  
7 and with best supportive care, respectively. Surgical resection (hazard ratio (HR)  
8  
9 0.61 (95% CI 0.47-0.79) and chemoradiotherapy according to the Stupp protocol  
10  
11 (HR 0.09 (95% CI 0.06-0.15) were strongly associated with favourable overall  
12  
13 survival, when adjusted for clinical variables.  
14  
15

16  
17  
18 **Conclusions:** In a real-world setting, less than half of the patients received full-  
19  
20 course chemoradiotherapy, with a median survival comparable to results from  
21  
22 clinical trials. Survival was considerably worse in patients receiving less  
23  
24 intensive treatment. Our results point out a substantial risk of undertreating  
25  
26 glioblastoma, especially in elderly patients.  
27  
28  
29  
30  
31  
32

### 33 **STRENGTHS AND LIMITATIONS OF THE STUDY**

- 34  
35 • This population-based study provides knowledge on treatment and survival from  
36  
37 glioblastoma in a real-world setting, including the establishment of long-term survival  
38  
39 rates.  
40  
41
- 42 • To our knowledge, this is the first study to use a standardized score in the assessment  
43  
44 of comorbidity burden in patients with glioblastoma.  
45  
46
- 47 • Detailed information on treatment and complications were available in all patients,  
48  
49 within a common patient record system used throughout the region.  
50  
51
- 52 • We included both patients with histologically confirmed glioblastoma and patients  
53  
54 with an MRI-based diagnosis to counteract the exclusion of elderly, frail patients and  
55  
56 patients with deep-seated tumours where biopsy was considered not feasible.  
57  
58  
59  
60



- Limitations of this study included the lack of molecular analysis and standardized performance assessment.

## INTRODUCTION

Glioblastoma WHO grade IV is the most frequent of the malignant primary brain tumours in adults.<sup>1 2</sup> Prognosis is poor, with a median overall survival of approximately 11 months and a five-year survival of less than 6% reported from population-based materials.<sup>1 3</sup> Standard diagnostic procedures in patients with primary brain tumours include neuroimaging and histopathological and molecular classification.<sup>4</sup> However, when clinicians consider a biopsy unsafe or not feasible, e.g. in patients with poor functional status or patients harbouring a deep-seated tumour, the diagnosis is based solely on radiological characteristics. Advanced magnetic resonance imaging (MRI) modalities have resulted in a greater ability to differentiate glioblastoma from other intracranial lesions.<sup>5 6</sup>

Gold standard management of glioblastoma is maximal safe resection or biopsy followed by chemoradiotherapy (CRT).<sup>4 7</sup> The implementation of the Stupp protocol, i.e. radiation therapy given as 60 Gy in 2 Gy fractions with concomitant temozolomide (TMZ) followed by six courses of TMZ monotherapy, improved overall survival in patients with good performance status and age up to 70 years, and is currently the gold standard of care.<sup>4 8</sup> Several targeted therapies have been evaluated in clinical trials, however currently not implemented in standard care.<sup>9</sup> Clinical trials have demonstrated that hypofractionated radiation therapy with or without TMZ, or TMZ alone if O<sup>6</sup>-methylguanine-DNA methyl transferase (MGMT) promoter is methylated, are beneficial treatment options in elderly patients.<sup>10-12</sup> Best supportive care may be an appropriate approach in the elderly and very frail patients, particularly in patients with multifocal or large tumours.<sup>4</sup> Elderly patients, patients

1  
2  
3 with poor performance status, and patients lacking histological confirmation of the diagnosis,  
4  
5 are excluded from most clinical trials. This may result in selection bias and impact survival  
6  
7 rates.  
8  
9

10  
11 We aimed to determine overall survival from glioblastoma in an unselected cohort of  
12  
13 consecutive patients diagnosed with glioblastoma during an eight-year period in a  
14  
15 geographically defined area of Western Norway. Furthermore, we analysed clinical and  
16  
17 radiological characteristics associated with treatment approach, and the association between  
18  
19 treatment intensity and survival.  
20  
21  
22

## 23 24 **METHODS**

25  
26 This was a population-based, retrospective cohort study of patients diagnosed with  
27  
28 glioblastoma between 1/1/2007 and 31/12/2014. Patients aged 18 years or older, diagnosed  
29  
30 with International Classification of Diseases 10th Revision (ICD-10) code C71 (malignant  
31  
32 neoplasm of brain) or C72 (malignant neoplasm of spinal cord, cranial nerves and other parts  
33  
34 of central nervous system) in the Western region of Norway, were identified through  
35  
36 electronic medical records. Both patients with histologically verified glioblastoma and  
37  
38 patients where the glioblastoma diagnosis was based solely on typical MRI characteristics  
39  
40 were enrolled. Patients from outside the region and patients with recurrent glioma,  
41  
42 synchronous malignancies, or lack of informed consent were excluded. During the study  
43  
44 period, the predefined geographical region served a population of approximately 1.020.000.<sup>13</sup>  
45  
46  
47 All hospitals provided medical treatment and supportive care to patients with glioblastoma.  
48  
49  
50 Neurosurgical treatment of patients with brain tumour was centralized to one hospital, while  
51  
52 radiation therapy was centralized to two hospitals in the region.  
53  
54  
55

56  
57 Demographics and patient characteristics were identified (table 1). Time of diagnosis  
58  
59 was defined as the date of the first MRI detecting the primary brain tumour. The follow-up  
60

1  
2  
3 period was at least five years, or until death. We defined patients aged 70 years and older as  
4 elderly, based on the cut-off value in relevant studies and clinical practice in the region.<sup>10 14-17</sup>

5  
6 Comorbidity was classified according to the Charlson comorbidity index.<sup>18</sup> We registered any  
7  
8 cognitive impairment described by clinicians, regardless of severity and causation.  
9

10  
11 Radiological characteristics were obtained from MRI reports. MGMT promoter methylation  
12  
13 and IDH mutation were not implemented as routine analyses in the study period.  
14  
15

16  
17 Information regarding primary treatment, complications, and survival were collected  
18  
19 from medical records. Surgery was categorized into resection, biopsy, and no surgical  
20  
21 intervention. Primary CRT was categorized into fullintensive treatment according to the Stupp  
22  
23 protocol, less intensive CRT, and best supportive care. Treatment according to the Stupp  
24  
25 protocol was defined as a delivered radiation dose of 60 Gy (and optional additional boost),  
26  
27 concomitant TMZ throughout the entire radiation therapy period, and at least one out of six  
28  
29 planned TMZ monotherapy courses fulfilled, in concordance with a previous and comparable  
30  
31 study.<sup>19</sup> Less intensive CRT was further classified into i) full-course radiation therapy (60 Gy  
32  
33 in 2 Gy fractions) and TMZ to a lesser extent than the Stupp protocol, ii) short-course  
34  
35 radiation therapy with concomitant TMZ and at least one monotherapy TMZ course, iii)  
36  
37 short-course radiation therapy with TMZ to a lesser extent or no TMZ, and iv) TMZ  
38  
39 monotherapy without radiation therapy.  
40  
41  
42  
43  
44

45  
46 Adverse events and complications including infections, bone marrow suppression  
47  
48 grade 3-4 according to CTCAE (Common Terminology Criteria for Adverse Events) Version  
49  
50 5.0, venous thromboembolism, epileptic seizures, and osteoporosis (defined as low-energy  
51  
52 fracture or bone density below -2.5 standard deviations measured by bone density scan) were  
53  
54 identified. We calculated survival rates from time of diagnosis, and defined long-term  
55  
56 survival as survival of more than five years.  
57  
58  
59  
60

## **Patient and public involvement**

Patients and the public were not involved in this study.

## **Ethics**

The study was approved by the Regional Committee for Medical and Health Research Ethics (no. 2014/1931). Informed consent was obtained from patients alive at the time of inclusion.

A waiver of consent was approved for deceased patients.

## **Statistics**

We used Chi-square test or Fisher's exact test as appropriate for categorical variables. For continuous variables, we used a t-test for normally distributed data, otherwise the Mann-Whitney U test. Verification of normality was done by quantile-quantile (Q-Q) plots. Clinical and radiological characteristics and their associations with treatment approach were analysed using binomial logistic regression. We applied the univariate and multivariate Cox proportional hazards regression models to evaluate the effect of treatment on overall survival. Cox proportional hazard assumption was tested for all variables. Clinical and radiological variables considered reasonably likely to influence the management approach and outcome were included in the models. Survival probabilities were calculated using a Kaplan Meier plot and groups compared by log-rank testing. Two-sided p-values  $<0.05$  were considered statistically significant. Statistical analyses were performed with IBM SPSS Statistics version 24 (SPSS Inc., Chicago, IL, USA).

## **RESULTS**

We identified 381 patients diagnosed with glioblastoma in the predefined geographical region between 1/1/2007 and 31/12/2014. From these, 16 patients were excluded according to exclusion criteria (non-resident (n=1), previous low-grade or anaplastic glioma (n=10),

synchronous cancer (n=4), and lack of informed consent (n=1)). One patient was lost to follow-up and one patient was excluded due to disproved glioblastoma diagnosis by autopsy. The remaining 363 patients diagnosed with glioblastoma in the predefined period were included. None of these participated in clinical trials. Histological confirmation of the diagnosis was lacking in 90 patients (24.8%), including two patients with non-representative biopsies, in whom the diagnosis was based on typical MRI characteristics. Amongst the 127 patients aged over 70 years, 65 (51.2%) lacked histological confirmation of the diagnosis, compared to 25 of the 236 patients (10.6%) aged under 70 years.

### Tumour and patient characteristics

Median age at the time of diagnosis was 64.6 years (range 18.1-94.9). Median age in patients with histologically confirmed glioblastoma was 61.5 years (range 18.1-86.1), compared to 77.0 years (range 35.0-94.9) in patients with an MRI-based diagnosis ( $p<0.0001$ ). Mean Charlson comorbidity score was 3.9 (standard deviation (SD) 1.4) in patients with histologically confirmed glioblastoma, compared to 5.7 (SD 1.6) in patients with an MRI-based diagnosis ( $p<0.0001$ ). Male/female ratio was 1.39. Additional patient and tumour characteristics are outlined in table 1.

**Table 1. Patient and tumour characteristics in adults diagnosed with glioblastoma between January 2007 and December 2014**

|                                | Total cohort<br>n=363 | Histologically<br>confirmed<br>glioblastoma<br>n=273 | MRI-based<br>diagnosis of<br>glioblastoma*<br>n=90 | p-value          |
|--------------------------------|-----------------------|------------------------------------------------------|----------------------------------------------------|------------------|
| <i>Patient characteristics</i> |                       |                                                      |                                                    |                  |
| Male gender                    | 211 (58%)             | 155 (57%)                                            | 56 (62%)                                           | 0.364            |
| Age $\geq$ 70 years            | 127 (35%)             | 62 (23%)                                             | 65 (72%)                                           | <b>&lt;0.001</b> |
| Initial symptoms               |                       |                                                      |                                                    |                  |
| Cognitive impairment           | 171 (47%)             | 126 (46%)                                            | 45 (50%)                                           | 0.526            |
| Headache                       | 159 (44%)             | 134 (49%)                                            | 25 (28%)                                           | <b>&lt;0.001</b> |

|    |                                           |           |           |          |                  |
|----|-------------------------------------------|-----------|-----------|----------|------------------|
| 1  |                                           |           |           |          |                  |
| 2  |                                           |           |           |          |                  |
| 3  | Mono-/hemiparesis                         | 122 (34%) | 85 (31%)  | 37 (41%) | 0.089            |
| 4  | Epilepsy at initial diagnosis             | 110 (30%) | 97 (36%)  | 13 (14%) | <b>&lt;0.001</b> |
| 5  | Central facial palsy                      | 96 (26%)  | 65 (24%)  | 31 (34%) | 0.047            |
| 6  | Dysphasia                                 | 85 (23%)  | 63 (23%)  | 22 (24%) | 0.790            |
| 7  | Severe gait dysfunction <sup>†</sup>      | 61 (17%)  | 32 (12%)  | 29 (32%) | <b>&lt;0.001</b> |
| 8  | Dizziness                                 | 62 (17%)  | 38 (14%)  | 24 (27%) | <b>&lt;0.001</b> |
| 9  | Visual field loss                         | 54 (15%)  | 38 (14%)  | 16 (18%) | <b>0.044</b>     |
| 10 | Previous radiation therapy to brain       | 4 (1%)    | 4 (1%)    | 0        | 0.486            |
| 11 | Glioblastoma in first-degree relative     | 3 (1%)    | 3 (1%)    | 0        | 0.318            |
| 12 |                                           |           |           |          |                  |
| 13 |                                           |           |           |          |                  |
| 14 |                                           |           |           |          |                  |
| 15 |                                           |           |           |          |                  |
| 16 | <i>Tumour characteristics</i>             |           |           |          |                  |
| 17 | Tumour localisation                       |           |           |          |                  |
| 18 | Frontal                                   | 88 (24%)  | 67 (25%)  | 21 (23%) | 0.897            |
| 19 | Temporal                                  | 82 (23%)  | 68 (25%)  | 14 (16%) | 0.080            |
| 20 | Parietal                                  | 28 (8%)   | 23 (8%)   | 5 (6%)   | 0.403            |
| 21 | Occipital                                 | 9 (2%)    | 6 (2%)    | 3 (3%)   | 0.526            |
| 22 | Overlapping                               | 108 (30%) | 89 (33%)  | 19 (21%) | 0.050            |
| 23 | Deep-seated <sup>‡</sup>                  | 46 (13%)  | 20 (7%)   | 26 (29%) | <b>&lt;0.001</b> |
| 24 | Corpus callosum invasion                  | 100 (28%) | 65 (24%)  | 35 (39%) | <b>0.005</b>     |
| 25 | Radiological signs of gliomatosis cerebri | 8 (2%)    | 7 (3%)    | 1 (1%)   | 0.425            |
| 26 | Multifocality                             | 90 (25%)  | 68 (25%)  | 22 (24%) | 0.930            |
| 27 | MRI contrast enhancement                  |           |           |          |                  |
| 28 | Circular (central necrosis)               | 263 (73%) | 194 (71%) | 69 (77%) | 0.458            |
| 29 | Irregular/patchy                          | 27 (7%)   | 21 (8%)   | 6 (7%)   | 0.673            |
| 30 | No enhancement                            | 3 (1%)    | 3 (1%)    | 0 -      | 0.546            |
| 31 | Information not available                 | 45 (12%)  | 35 (13%)  | 10 (11%) | 0.670            |

Results presented in absolute numbers and % of total. Comparison between groups (histologically confirmed glioblastoma and MRI based glioblastoma diagnosis) was performed by Chi-square test (Fisher's exact test when expected cell count <5).

\* Highly suspected glioblastoma based on typical MRI characteristics, biopsy not performed; † Inability to walk without support; ‡ Thalamus, basal ganglia, internal capsule, splenium corpus callosum, mesencephalon, brain stem, and cerebellum.

MRI=magnetic resonance imaging.

Headache and epilepsy were more frequent in patients with histologically confirmed glioblastoma compared to patients with an MRI-based diagnosis, whilst dizziness and gait dysfunction were more frequent among patients with an MRI-based diagnosis. Classification of performance status by validated screening tools (e.g. ECOG and Karnofsky score) was not applicable due to insufficient documentation of performance status in the medical records.

## Treatment and complications

Surgical resection was performed in 221 of 363 patients (60.9%). Radiation therapy was given to 323 patients (89.0%), where full-course radiation therapy (60 Gy or 60Gy with additional boost) was planned or commenced in 218 patients. Among these 218 patients, 14 (6.4%) had the treatment cancelled (n=1), discontinued (n=5), or converted to a short-course regimen (n=8). Change in radiation therapy plan was due to poor general condition or rapid clinical deterioration (n=11), patient preferences (n=2), or acute complications (n=1). Further, 120 patients were allocated to short-course radiation therapy. Among these, the treatment was cancelled (n=13) or discontinued (n=11) in 24 patients (20.0%), due to poor general condition (n=14), acute complications (n=7), or patient preferences (n=3).

Chemoradiotherapy (CRT) according to the Stupp protocol was prepared or commenced in 185 patients, while the treatment plan was changed or prematurely interrupted in 28 of these (15.1%). Consequently, 157 patients (43.3% of the total cohort) received CRT according to the Stupp protocol, including 11 patients without histological confirmation. Nine of these 11 patients had deep-seated tumours. In patients receiving adjuvant TMZ, regardless of radiation therapy dose, the mean number of TMZ courses was 4.6 (range 1-14). Nine of the patients who underwent resection were not eligible for CRT, due to complications, rapid progression, or poor general condition. Among 236 patients aged under 70 years, 144 (61.0%) received CRT according to the Stupp protocol, 85 patients (36.0%) received less intensive CRT, and 7 patients (3.0%) received best supportive care. In the cohort of 127 patients aged over 70 years, 13 (10.2%) received CRT according to the Stupp protocol, 82 patients (64.6%) received less intensive CRT, and 32 patients (25.2%) received best supportive care.

Associations between patient and tumour characteristics and treatment approach are presented in table 2. Elderly patients, patients with multifocal or deep-seated tumours, and

patients with higher comorbidity burden were less likely to undergo surgical resection, according to adjusted logistic regression analyses. Elderly patients, patients with cognitive impairment, patients with increasing comorbidity burden, and females were less likely to receive CRT according to the Stupp protocol.

**Table 2. Associations between patient and tumour characteristics and treatment approach in 363 patients diagnosed with glioblastoma between January 2007 and December 2014.**

|                                 | No resection |               | CRT less intensive than Stupp protocol <sup>†</sup> |               |             |               |            |               |
|---------------------------------|--------------|---------------|-----------------------------------------------------|---------------|-------------|---------------|------------|---------------|
|                                 | Unadjusted   |               | Adjusted                                            |               | Unadjusted  |               | Adjusted   |               |
|                                 | OR           | (95% CI)      | OR                                                  | (95% CI)      | OR          | (95% CI)      | OR         | (95% CI)      |
| Female gender                   | 1.1          | (0.7-1.6)     | 1.0                                                 | (0.6-1.7)     | <b>1.7</b>  | (1.1-2.5)*    | <b>1.8</b> | (1.1-3.1)*    |
| Age ≥ 70 years                  | <b>4.5</b>   | (2.9-7.2)***  | <b>3.0</b>                                          | (1.5-6.3)**   | <b>13.7</b> | (7.3-25.8)*** | <b>5.1</b> | (2.2-11.8)*** |
| Cognitive impairment            | 1.2          | (0.8-1.8)     | 1.2                                                 | (0.8-2.1)     | <b>1.8</b>  | (0.6-1.7)**   | 1.8        | (1.1-3.0)*    |
| Charlson comorbidity score      | <b>1.5</b>   | (1.3-1.8)***  | <b>1.3</b>                                          | (1.0-1.6)*    | <b>2.2</b>  | (1.8-2.6)***  | <b>1.6</b> | (1.2-2.0)***  |
| Multifocal tumour               | <b>1.9</b>   | (1.2-3.1)**   | <b>2.6</b>                                          | (1.5-4.6)*    | 1.2         | (0.7-1.9)     | 1.6        | (0.9-2.9)     |
| Deep seated tumour <sup>‡</sup> | <b>7.3</b>   | (3.5-15.3)*** | <b>10.0</b>                                         | (4.4-22.3)*** | 1.4         | (0.7-2.6)     | 1.5        | (0.7-3.2)     |

OR, 95% CI and p-values calculated by binomial logistic regression. No resection (=1) compared to resection (=0). No CRT or less intensive CRT (=1) compared to Stupp protocol (=0).

Two-sided p-values <0.05 were considered statistically significant; \*p<0.05; \*\*p<0.01; \*\*\*p<0.001; results not marked by an asterisk are not significant.

<sup>†</sup> Stupp protocol = Radiation therapy 60 Gy in 2 Gy fractions (delivered), fulfilled concomitant TMZ, and fulfilled at least one out of six planned TMZ monotherapy courses

<sup>‡</sup> Thalamus, basal ganglia, internal capsule, splenium corpus callosum, mesencephalon, brain stem, and cerebellum.

CI=confidence interval; CRT=chemoradiotherapy; Gy=Gray; OR=odds ratio; TMZ=Temozolomide.

In total 188 patients (51.8%) had at least one epileptic seizure, the majority at the time of diagnosis. Venous thromboembolism (deep venous thrombosis of extremity, pulmonary embolism, or sinus vein thrombosis) occurred in 75 patients (20.7%), while 26 patients (7.2%) were diagnosed with osteoporosis. Among 247 patients receiving initial chemotherapy, CTCAE grade 3-4 bone marrow suppression, i.e. platelet count < 50.0 x 10<sup>9</sup>/L and/or neutrophil count <1.0 x 10<sup>9</sup>/L, occurred in 37 patients (15.0%). Fifty-eight patients (23.5%) had bacterial or viral infections, whilst 11 patients (4.5%) experienced septicaemia or neutropenic fever.



## Survival

Median overall survival was 10.2 months (95% CI 9.1-11.3 months). One-year, two-year, three-year and five-year survival rates were 41.3%, 17.3%, 9.1% and 4.1%, respectively.

Median survival amongst patients with histologically confirmed glioblastoma was 12.6 months (95% CI 11.4-13.8), compared to 4.5 months (95% CI 4.0-5.1) in patients with an MRI-based diagnosis ( $p < 0.0001$ ). In total, 354 of the 363 included patients (97.5%) died during the study period, and one patient was lost to follow-up. Kaplan Meier curves of survival according to age, surgery and CRT are presented in figure 1. Median survival in patients aged under 70 years was 13.5 months (95% CI 12.1-14.9), compared to 5.2 months (95% CI 4.1-6.3) in patients aged over 70 years. Median survival in patients who underwent resection was 13.7 months (95% CI 12.1-15.4), compared to 8.3 months (95% CI 6.6-9.9) for those who underwent biopsy, and 4.5 months (95% CI 4.0-5.1) in patients with no surgical intervention. Median survival in patients receiving CRT according to the Stupp protocol was 16.3 months (95% CI 14.1-18.5), compared to 7.9 months (95% CI 6.7-9.0) and 2.0 months (95% CI 0.9-3.2) in patients treated with less intensive CRT or best supportive care, respectively. In patients aged over 70 years and receiving CRT according to the Stupp protocol, median survival was 21.4 months (95% CI 7.5-35.3), compared to 6.0 months (95% CI 4.7-7.7) and 2.0 months (95% CI 0.7-3.4) in those treated with less intensive CRT or best supportive care. Among 157 patients receiving CRT according to the Stupp protocol, 49 patients (31.2%) survived for longer than two years, and 14 patients (8.9%) survived for more than five years.

[Figure 1 near here]

Univariate and multivariate Cox proportional hazards regression models of overall survival are presented in table 3. Resection compared to no resection was strongly associated with improved overall survival according to multivariate analyses (HR 0.61,  $p < 0.001$ ). CRT

according to the Stupp protocol (HR 0.09,  $p < 0.001$ ) and less intensive CRT (HR 0.17,  $p < 0.001$ ) were strongly associated with better outcomes.

**Table 3. Univariate and multivariate Cox regression analysis of overall survival in 363 patients diagnosed with glioblastoma between January 2007 and December 2014.**

| Variables                       | Univariate analysis |              |                  | Multivariate analysis |             |                  |
|---------------------------------|---------------------|--------------|------------------|-----------------------|-------------|------------------|
|                                 | HR                  | (95% CI)     | p-value          | HR                    | (95% CI)    | p-value          |
| Female gender                   | 1.04                | (0.784-1.29) | 0.71             | <b>0.91</b>           | (0.73-1.14) | 0.40             |
| Age $\geq 70$ years             | 3.00                | (2.38-3.77)  | <b>&lt;0.001</b> | <b>1.32</b>           | (0.93-1.87) | 0.12             |
| Cognitive impairment            | 1.25                | (1.01-1.54)  | <b>0.04</b>      | <b>1.06</b>           | (0.84-1.32) | 0.64             |
| Charlson comorbidity            | 1.44                | (1.34-1.54)  | <b>&lt;0.001</b> | <b>1.22</b>           | (1.10-1.35) | <b>&lt;0.001</b> |
| Deep seated tumour <sup>†</sup> | 1.78                | (1.30-2.44)  | <b>&lt;0.001</b> | 1.54                  | (1.09-2.19) | <b>0.02</b>      |
| Multifocality                   | 1.53                | (1.20-1.95)  | <b>&lt;0.01</b>  | 1.42                  | (1.09-1.84) | <b>&lt;0.01</b>  |
| Surgical treatment              |                     |              |                  |                       |             |                  |
| No resection                    | Ref                 |              |                  | Ref                   |             |                  |
| Resection                       | 0.39                | (0.31-0.48)  | <b>&lt;0.001</b> | 0.61                  | (0.47-0.79) | <b>&lt;0.001</b> |
| Chemoradiotherapy               |                     |              |                  |                       |             |                  |
| No CRT                          | Ref                 |              |                  | Ref                   |             |                  |
| Less intensive CRT              | 0.12                | (0.08-0.18)  | <b>&lt;0.001</b> | 0.17                  | (0.11-0.26) | <b>&lt;0.001</b> |
| Stupp protocol <sup>‡</sup>     | 0.05                | (0.03-0.07)  | <b>&lt;0.001</b> | <b>0.09</b>           | (0.06-0.15) | <b>&lt;0.001</b> |

HR, 95% CI and p-values calculated by univariate and multivariate Cox proportional hazards regression model. P-values  $< 0.05$  considered statistically significant.

<sup>†</sup>thalamus, basal ganglia, internal capsule, splenium corpus callosum, mesencephalon, brain stem, and cerebellar vermis.

<sup>‡</sup>Radiation therapy 60 Gy in 2 Gy fractions (delivered), fulfilled concomitant TMZ, and fulfilled at least one out of six planned TMZ monotherapy courses

HR=hazard ratio; CI=confidence interval; CRT=chemoradiotherapy; Gy=Gray

An alluvial diagram visualizes the consecutive treatment modalities and the association with median survival (figure 2). In the whole cohort, 15 patients (4.1%) achieved long-term survival of more than five years. Twelve of these patients underwent surgical resection, whereas three had a biopsy alone. Moreover, 14 out of 15 long-term surviving

1  
2  
3 patients completed the Stupp protocol, whilst one patient received hypofractionated radiation  
4  
5 therapy followed by TMZ monotherapy. All 15 long-term surviving patients completed at  
6  
7 least six maintenance TMZ courses (range six to nine).

8  
9  
10 [Figure 2 near here]

## 11 12 13 14 **DISCUSSION**

15  
16 Median overall survival in our cohort of 363 consecutive patients diagnosed with  
17  
18 glioblastoma was approximately 10 months. Surgical resection and full-course  
19  
20 chemoradiotherapy (CRT) were strongly associated with improved survival, as demonstrated  
21  
22 by multivariate Cox regression. However, only two thirds of the patients underwent resection,  
23  
24 and less than half of the patients received CRT according to the Stupp protocol. Age over 70  
25  
26 years was strongly associated with less intensive treatment, both surgery and CRT.

27  
28 Irrespective of age, those who received treatment according to the Stupp protocol, had a  
29  
30 favourable prognosis with median survival and long-term survival rates comparable to those  
31  
32 observed in clinical trials. Survival was considerably worse in elderly patients and patients  
33  
34 receiving less intensive treatment. A significant number of patients received best supportive  
35  
36 care only, thus the overall survival was poorer in this population-based study compared to  
37  
38 results from clinical trials.

39  
40  
41  
42  
43  
44 Histological confirmation of the diagnosis was lacking in approximately 25% of the  
45  
46 patients in our cohort. There are limited real-world data describing the frequency of omitting  
47  
48 biopsy in patients with a high suspicion of glioblastoma according to MRI. A previous  
49  
50 Norwegian study reported that 12% of the patients diagnosed with glioblastoma had a  
51  
52 diagnosis based solely on radiological pattern or autopsy.<sup>20</sup> Conversely, an English  
53  
54 population-based study reported that less than 10% of patients aged under 70 years, and 40%  
55  
56 of patients aged over 70 years, lacked histological confirmation of the diagnosis, comparable  
57  
58 to our findings.<sup>21</sup> We found that patients with MRI-based diagnoses were older and had a  
59  
60

1  
2  
3 higher comorbidity burden, and they more often had deep-seated tumours. In addition, they  
4  
5 more commonly presented with dizziness and gait disturbances, which are vague and often  
6  
7 slowly progressing symptoms that may have led to a delay in diagnosis compared to patients  
8  
9 presenting with epileptic seizure or headache. It is reasonable to assume that established  
10  
11 experiences and traditions among clinicians may influence the choice of intervention, e.g.  
12  
13 emphasizing the risk of complications related to neurosurgery in elderly or frail patients, and  
14  
15 patients with deep-seated tumours. The dismal prognosis of patients not undergoing resection  
16  
17 is another possible contributing factor to the choice of this management. A further reason may  
18  
19 be the improvement of MRI techniques, including perfusion-weighted imaging and diffusion-  
20  
21 weighted MRI, facilitating the distinction of glioblastoma from other intracranial lesions.<sup>22 23</sup>  
22  
23 However, in order to increase the diagnostic accuracy, biopsy should also be recommended in  
24  
25 patients considered unlikely to benefit from resection, when considered feasible and safe.  
26  
27  
28  
29

30  
31 Resection was performed in 61% of the patients in this cohort, in line with the  
32  
33 aforementioned study from England.<sup>21</sup> However, the resection rate was lower than reported in  
34  
35 other previous population-based studies, where 74% of patients underwent resection.<sup>3 19</sup> A  
36  
37 possible explanation is our inclusion of patients with an MRI-based glioblastoma diagnosis,  
38  
39 and a higher number of patients with deep-seated tumours. Patients who underwent resection  
40  
41 had a significantly better survival than those who underwent biopsy or no surgical  
42  
43 intervention.  
44  
45

46  
47 Nearly 90% of the patients in our cohort received radiotherapy, the majority in  
48  
49 combination with TMZ. Multivariate Cox regression, with adjustment for age and other  
50  
51 clinical variables, demonstrated improved overall survival in patients receiving CRT  
52  
53 according to the Stupp. However, less than half of the patients received CRT according to the  
54  
55 Stupp protocol, similar to the findings of Lwin and colleagues.<sup>19</sup> We assume that the  
56  
57 frequency of elderly patients, patients with a significant comorbidity burden, and patients with  
58  
59  
60

1  
2  
3 extensive symptoms including cognitive impairment, influence the choice of therapeutic  
4 intensity and the capacity of patients to complete commenced treatment. Patients aged over 70  
5 years received less intensive treatment compared to younger patients, in concordance with  
6 previous studies of elderly patients with glioblastoma.<sup>3 14 15 21</sup>  
7  
8  
9

10  
11  
12 Median overall survival in our cohort was approximately 10 months, comparable with  
13 results from previous population-based studies with median survival ranging from 6.1 to 15.3  
14 months.<sup>3 19-21 24 25</sup> A five-year survival rate of approximately 4% was equal to that reported in  
15 large population-based materials.<sup>1 21</sup> A recent systematic review reported a superior median  
16 overall survival of 15.6 months in the post-Stupp era.<sup>26</sup> However, nearly one third of the  
17 studies included in this review article were clinical trials, with an expected superiority in  
18 survival rates compared to population-based materials. In our cohort, outcome was  
19 considerably better in patients receiving CRT according to the Stupp protocol, with a median  
20 survival of approximately 16 months and a five-year survival rate of 8.9%. This was in line  
21 with the results from the randomized clinical trial by Stupp and colleagues, where median  
22 survival in the CRT arm was 14.6 months, and five-year survival was 9.8%.<sup>8 27</sup> Our results  
23 highlight the gap between the survival rates reported from clinical studies and those observed  
24 in a real-world setting.  
25  
26  
27  
28  
29  
30  
31  
32  
33  
34  
35  
36  
37  
38  
39  
40  
41

42 Median overall survival in patients aged over 70 years was 5.2 months in our cohort,  
43 in line with previous population-based studies where median survival ranged from less than  
44 three upto four months.<sup>14 15 17 21</sup> Survival in elderly patients in our cohort was strongly  
45 associated with a CRT treatment approach, and ranged from two months in patients receiving  
46 best supportive care to 21 months in patients receiving CRT according to the Stupp protocol.  
47 This was comparable to results from previous population-based studies in elderly patients.<sup>3 28</sup>  
48 As expected, median overall survival in elderly patients was lower in our unselected cohort  
49 than that demonstrated in prospective clinical trials, where median survival ranged from 5.2 to  
50  
51  
52  
53  
54  
55  
56  
57  
58  
59  
60

1  
2  
3 9.6 months depending on CRT.<sup>10-12 16</sup> A recent Cochrane analysis concluded that CRT  
4 improved survival compared to radiation therapy alone in elderly patients capable of self-  
5 care.<sup>29</sup> The improved survival in elderly patients receiving combined CRT, both in our cohort  
6 and previous studies, demonstrates a potential benefit from intensive treatment in this group.<sup>3</sup>  
7  
8  
9  
10  
11  
12  
13 <sup>11 28 30</sup> A disregard of this issue may risk potentially undertreating elderly patients.  
14  
15 Nevertheless, in patients of advanced age, or suffering from extensive disabilities, best  
16 supportive care may be an appropriate approach.  
17  
18  
19

20 As concerns the methodology of our study, we regards the population-based design as  
21 a strength. The long-term follow-up of an unselected cohort provides knowledge on treatment  
22 and survival from glioblastoma, including the establishment of long-term survival rates, and  
23 the inclusion period ensured that all included patients were diagnosed with glioblastoma after  
24 the implementation of the current standard treatment. Other strengths were the low dropout  
25 rate of only one patient (0.3%), and the detailed clinical information on treatment and  
26 complications available in all patients within a common patient record system throughout the  
27 region. Among the limitations of the study was the lack of molecular analyses. Further,  
28 performance status was not sufficiently described in medical records and not applicable to  
29 validated screening tools. To counteract this, comorbidity burden, cognitive impairment and  
30 gait dysfunction were included in the analyses. In addition, surgical resection was not  
31 classified into degree of resection; hence, the survival curves do not differentiated between  
32 macroscopic complete and partial resection. The inclusion of patients with MRI-based  
33 diagnosis can be considered both a disadvantage and an advantage. To reduce the risk of  
34 incorrect inclusion of non-glioblastoma patients, we included only patients when clinicians  
35 and radiologists unequivocally considered glioblastoma the most likely diagnosis. Even  
36 though biopsy is highly recommended and standard of care, it is not always considered  
37 feasible and safe. Therefore, the inclusion of these patients provides knowledge on the  
38  
39  
40  
41  
42  
43  
44  
45  
46  
47  
48  
49  
50  
51  
52  
53  
54  
55  
56  
57  
58  
59  
60

1  
2  
3 diagnostic approach and survival of all patients with highly suspected glioblastoma based on  
4  
5 MRI.  
6  
7

8 In conclusion, the prognosis of glioblastoma was considerably worse in a real-world  
9  
10 setting compared to results from clinical trials. In patients receiving treatment according to the  
11  
12 Stupp protocol, survival rates were comparable to that achieved in clinical trials. Multivariate  
13  
14 Cox regression demonstrated that both resection and CRT were strongly associated with  
15  
16 better outcome. However, only two thirds of the patients in our cohort underwent resection,  
17  
18 and less than half of the patients received treatment according to the Stupp protocol. Our  
19  
20 results point towards a substantial risk of undertreating patients with glioblastoma, especially  
21  
22 in elderly patients, and a potential benefit from choosing a more aggressive treatment  
23  
24 approach.  
25  
26  
27  
28

### 29 **Funding statement**

30  
31  
32 This research received no specific grant from any funding agency in the public, commercial or  
33  
34 non-for-profit sectors.  
35  
36

### 37 **Disclosure of interest**

38  
39  
40 The authors report no conflicts of interest.  
41  
42

### 43 **Acknowledgements**

44  
45  
46 The authors would like to thank Anastasia Ushakova at Stavanger University Hospital for  
47  
48 support in statistical analyses, and Joanna Haynes at Stavanger University Hospital for  
49  
50 proofreading the article.  
51  
52

### 53 **Contributors**

54  
55 All co-authors have contributed to the design of the work and, are accountable for all its  
56  
57 aspects. LSB, OF and EF initiated the study and were responsible for study design and data  
58  
59 collecting. LSB was responsible for statistical analyses, contributed by OF, BG, RM and EF,  
60



with support from statistician AU. All co-authors participated in the interpretation of the results. LSB and OF designed the figures. LSB drafted the initial manuscript, and all co-authors reviewed and edited the paper. All co-authors approved the final version of the manuscript.

### Data sharing

No data are available

### References

- Ostrom QT, Gittleman H, Truitt G, et al. CBTRUS Statistical Report: Primary Brain and Other Central Nervous System Tumors Diagnosed in the United States in 2011-2015. *Neuro-oncology* 2018;20(suppl\_4):iv1-iv86. doi: 10.1093/neuonc/noy131 [published Online First: 2018/11/18]
- Wen PY, Huse JT. 2016 World Health Organization Classification of Central Nervous System Tumors. *Continuum (Minneapolis, Minn)* 2017;23(6, Neuro-oncology):1531-47. doi: 10.1212/con.0000000000000536 [published Online First: 2017/12/05]
- Hansen S, Rasmussen BK, Laursen RJ, et al. Treatment and survival of glioblastoma patients in Denmark: The Danish Neuro-Oncology Registry 2009-2014. *Journal of neuro-oncology* 2018 doi: 10.1007/s11060-018-2892-7 [published Online First: 2018/05/14]
- Weller M, van den Bent M, Hopkins K, et al. EANO guideline for the diagnosis and treatment of anaplastic gliomas and glioblastoma. *The Lancet Oncology* 2014;15(9):e395-e403. doi: [https://doi.org/10.1016/S1470-2045\(14\)70011-7](https://doi.org/10.1016/S1470-2045(14)70011-7)
- Saini J, Kumar Gupta P, Awasthi A, et al. Multiparametric imaging-based differentiation of lymphoma and glioblastoma: using T1-perfusion, diffusion, and susceptibility-weighted MRI. *Clinical Radiology* 2018;73(11) doi: 10.1016/j.crad.2018.07.107
- Suh CH, Kim HS, Jung SC, et al. Perfusion MRI as a diagnostic biomarker for differentiating glioma from brain metastasis: a systematic review and meta-analysis. *European radiology* 2018;28(9):3819-31. doi: 10.1007/s00330-018-5335-0 [published Online First: 2018/04/06]
- Sulman EP, Ismaila N, Armstrong TS, et al. Radiation Therapy for Glioblastoma: American Society of Clinical Oncology Clinical Practice Guideline Endorsement of the American Society for Radiation Oncology Guideline. *Journal of clinical oncology : official journal of the American Society of Clinical Oncology* 2017;35(3):361-69. doi: 10.1200/jco.2016.70.7562 [published Online First: 2016/11/29]
- Stupp R, Mason WP, van den Bent MJ, et al. Radiotherapy plus Concomitant and Adjuvant Temozolomide for Glioblastoma. *New England Journal of Medicine* 2005;352(10):987-96. doi: 10.1056/NEJMoa043330
- Elmira M, Negar S-B, Hamid M, et al. The Current State of Potential Therapeutic Modalities for Glioblastoma Multiforme: A Clinical Review. *Current Drug Metabolism* 2020;21(8):564-78. doi: <http://dx.doi.org/10.2174/1389200221666200714101038>
- Malmstrom A, Gronberg BH, Marosi C, et al. Temozolomide versus standard 6-week radiotherapy versus hypofractionated radiotherapy in patients older than 60 years with glioblastoma: the Nordic randomised, phase 3 trial. *The Lancet Oncology* 2012;13(9):916-26. doi: 10.1016/s1470-2045(12)70265-6 [published Online First: 2012/08/11]
- Perry JR, Laperriere N, O'Callaghan CJ, et al. Short-Course Radiation plus Temozolomide in Elderly Patients with Glioblastoma. *N Engl J Med* 2017;376(11):1027-37. doi: 10.1056/NEJMoa1611977 [published Online First: 2017/03/16]



12. Wick W, Platten M, Meisner C, et al. Temozolomide chemotherapy alone versus radiotherapy alone for malignant astrocytoma in the elderly: the NOA-08 randomised, phase 3 trial. *The Lancet Oncology* 2012;13(7):707-15. doi: 10.1016/s1470-2045(12)70164-x [published Online First: 2012/05/15]
13. Statistics Norway. 2020:Population and area (M) 2007-20.
14. Coate L, McNamara MG, Lwin Z, et al. Glioblastoma treatment in the elderly in the temozolomide therapy era. *The Canadian journal of neurological sciences Le journal canadien des sciences neurologiques* 2014;41(3):357-62. doi: 10.1017/s0317167100017303 [published Online First: 2014/04/11]
15. Gately L, Collins A, Murphy M, et al. Age alone is not a predictor for survival in glioblastoma. *Journal of neuro-oncology* 2016;129(3):479-85. doi: 10.1007/s11060-016-2194-x
16. Minniti G, De Sanctis V, Muni R, et al. Hypofractionated radiotherapy followed by adjuvant chemotherapy with temozolomide in elderly patients with glioblastoma. *Journal of neuro-oncology* 2009;91(1):95-100. doi: 10.1007/s11060-008-9689-z
17. Pretanvil J-A, Salinas IQ, Piccioni DE. Glioblastoma in the elderly: treatment patterns and survival. *CNS oncology* 2017;6(1):19-28. doi: 10.2217/cns-2016-0023 [published Online First: 2016/12/21]
18. Charlson M, Szatrowski TP, Peterson J, et al. Validation of a combined comorbidity index. *Journal of clinical epidemiology* 1994;47(11):1245-51. doi: [https://doi.org/10.1016/0895-4356\(94\)90129-5](https://doi.org/10.1016/0895-4356(94)90129-5)
19. Lwin Z, MacFadden D, Al-Zahrani A, et al. Glioblastoma management in the temozolomide era: have we improved outcome? *Journal of neuro-oncology* 2013;115(2):303-10. doi: 10.1007/s11060-013-1230-3 [published Online First: 2013/08/28]
20. Ronning PA, Helseth E, Meling TR, et al. A population-based study on the effect of temozolomide in the treatment of glioblastoma multiforme. *Neuro-oncology* 2012;14(9):1178-84. doi: 10.1093/neuonc/nos153 [published Online First: 2012/08/08]
21. Brodbelt A, Greenberg D, Winters T, et al. Glioblastoma in England: 2007–2011. *European Journal of Cancer* 2015;51(4):533-42. doi: <https://doi.org/10.1016/j.ejca.2014.12.014>
22. Chiang IC, Kuo Y-T, Lu C-Y, et al. Distinction between high-grade gliomas and solitary metastases using peritumoral 3-T magnetic resonance spectroscopy, diffusion, and perfusion imagings. *Neuroradiology* 2004;46(8):619-27. doi: 10.1007/s00234-004-1246-7
23. Radbruch A, Wiestler B, Kramp L, et al. Differentiation of glioblastoma and primary CNS lymphomas using susceptibility weighted imaging. *European journal of radiology* 2013;82(3):552-6. doi: 10.1016/j.ejrad.2012.11.002 [published Online First: 2012/12/15]
24. Teo M, Martin S, Owusu-Agyemang K, et al. A survival analysis of GBM patients in the West of Scotland pre- and post-introduction of the Stupp regime. *British journal of neurosurgery* 2014;28(3):351-5. doi: 10.3109/02688697.2013.847170 [published Online First: 2013/10/12]
25. Bruhn H, Strandéus M, Milos P, et al. Improved survival of Swedish glioblastoma patients treated according to Stupp. 2018;138(4):332-37. doi: 10.1111/ane.12966
26. Marenco-Hillebrand L, Wijesekera O, Suarez-Meade P, et al. Trends in glioblastoma: outcomes over time and type of intervention: a systematic evidence based analysis. *Journal of neuro-oncology* 2020 doi: 10.1007/s11060-020-03451-6 [published Online First: 2020/03/12]
27. Stupp R, Hegi ME, Mason WP, et al. Effects of radiotherapy with concomitant and adjuvant temozolomide versus radiotherapy alone on survival in glioblastoma in a randomised phase III study: 5-year analysis of the EORTC-NCIC trial. *The Lancet Oncology* 2009;10(5):459-66. doi: 10.1016/s1470-2045(09)70025-7 [published Online First: 2009/03/10]
28. Rusthoven CG, Koshy M, Sher DJ, et al. Combined-Modality Therapy With Radiation and Chemotherapy for Elderly Patients With Glioblastoma in the Temozolomide Era: A National Cancer Database Analysis. *JAMA neurology* 2016;73(7):821-28. doi: 10.1001/jamaneurol.2016.0839 %J JAMA Neurology

- 1  
2  
3 29. Hanna C, Lawrie TA, Rogozinska E, et al. Treatment of newly diagnosed glioblastoma in the  
4 elderly: a network meta-analysis. *Cochrane Database Syst Rev* 2020;3:CD013261. doi:  
5 10.1002/14651858.CD013261.pub2 [published Online First: 2020/03/24]  
6  
7 30. Youssef M, Ludmir EB, Mandel JJ, et al. Treatment strategies for glioblastoma in older patients:  
8 age is just a number. *Journal of neuro-oncology* 2019;145(2):357-64. doi: 10.1007/s11060-  
9 019-03304-x  
10  
11  
12  
13  
14  
15  
16  
17  
18  
19  
20  
21  
22  
23  
24  
25  
26  
27  
28  
29  
30  
31  
32  
33  
34  
35  
36  
37  
38  
39  
40  
41  
42  
43  
44  
45  
46  
47  
48  
49  
50  
51  
52  
53  
54  
55  
56  
57  
58  
59  
60

For peer review only

**FIGURE LEGENDS:**

**Figure 1. Overall survival in 363 adults diagnosed with glioblastoma between January 2007 and December 2014.**

a) Survival by age. b) Survival by surgical treatment. c) Survival by chemoradiotherapy. d) Survival by chemoradiotherapy in patients aged 70 years or older.

Stupp protocol is here defined as completed radiation therapy in total dose of 60 Gy in 2 Gy fractions, concomitant Temozolomide in the entire radiation therapy period, and completed at least one out six planned Temozolomide monotherapy courses. Cumulative survival in months with 95% Confidence Interval (CI) bands. Groups compared with log rank test.

**Figure 2. Alluvial diagram visualising associations between combination of treatment modalities and median survival in an unselected cohort of 363 patients diagnosed with glioblastoma between January 2007 and December 2014.**

The width of the curves represents the absolute number of patients. The colours of the curves correspond to median survival in months.

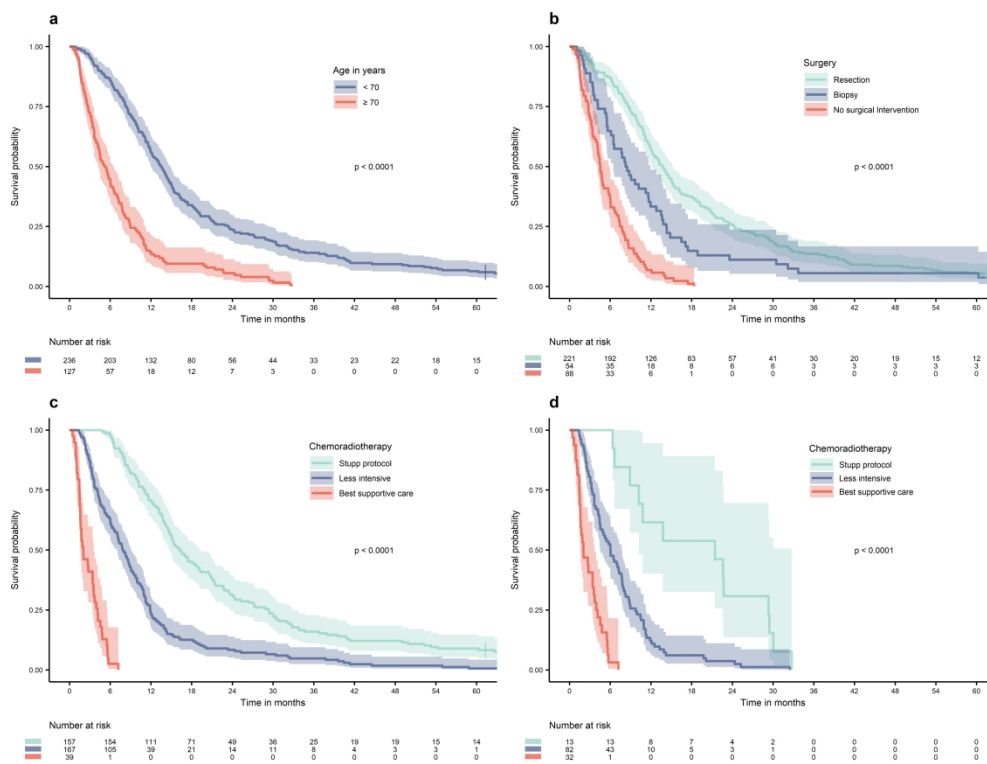

Figure 1. Overall survival in 363 adults diagnosed with glioblastoma between January 2007 and December 2014.

299x229mm (300 x 300 DPI)

1  
2  
3  
4  
5  
6  
7  
8  
9  
10  
11  
12  
13  
14  
15  
16  
17  
18  
19  
20  
21  
22  
23  
24  
25  
26  
27  
28  
29  
30  
31  
32  
33  
34  
35  
36  
37  
38  
39  
40  
41  
42  
43  
44  
45  
46  
47  
48  
49  
50  
51  
52  
53  
54  
55  
56  
57  
58  
59  
60



Figure 2. Alluvial diagram visualising associations between combination of treatment modalities and median survival in an unselected cohort of 363 patients diagnosed with glioblastoma between January 2007 and December 2014.

209x139mm (600 x 600 DPI)

STROBE Statement—Checklist of items that should be included in reports of *cohort studies*

|                              | Item No | Recommendation                                                                                                                                                                                    | Page number                             |
|------------------------------|---------|---------------------------------------------------------------------------------------------------------------------------------------------------------------------------------------------------|-----------------------------------------|
| <b>Title and abstract</b>    | 1       | (a) Indicate the study's design with a commonly used term in the title or the abstract                                                                                                            | 1 (title page), 2                       |
|                              |         | (b) Provide in the abstract an informative and balanced summary of what was done and what was found                                                                                               | 2                                       |
| <b>Introduction</b>          |         |                                                                                                                                                                                                   |                                         |
| Background/rationale         | 2       | Explain the scientific background and rationale for the investigation being reported                                                                                                              | 4-5                                     |
| Objectives                   | 3       | State specific objectives, including any prespecified hypotheses                                                                                                                                  | 5                                       |
| <b>Methods</b>               |         |                                                                                                                                                                                                   |                                         |
| Study design                 | 4       | Present key elements of study design early in the paper                                                                                                                                           | 5                                       |
| Setting                      | 5       | Describe the setting, locations, and relevant dates, including periods of recruitment, exposure, follow-up, and data collection                                                                   | 5                                       |
| Participants                 | 6       | (a) Give the eligibility criteria, and the sources and methods of selection of participants. Describe methods of follow-up                                                                        | 5                                       |
|                              |         | (b) For matched studies, give matching criteria and number of exposed and unexposed                                                                                                               | Not applicable                          |
| Variables                    | 7       | Clearly define all outcomes, exposures, predictors, potential confounders, and effect modifiers. Give diagnostic criteria, if applicable                                                          | 5-6<br>Table 1 and 2<br>(page 8 and 11) |
| Data sources/<br>measurement | 8*      | For each variable of interest, give sources of data and details of methods of assessment (measurement). Describe comparability of assessment methods if there is more than one group              | 5-6                                     |
| Bias                         | 9       | Describe any efforts to address potential sources of bias                                                                                                                                         | 5, 9, 17                                |
| Study size                   | 10      | Explain how the study size was arrived at                                                                                                                                                         | 7                                       |
| Quantitative variables       | 11      | Explain how quantitative variables were handled in the analyses. If applicable, describe which groupings were chosen and why                                                                      | 5, 7                                    |
| Statistical methods          | 12      | (a) Describe all statistical methods, including those used to control for confounding                                                                                                             | 7                                       |
|                              |         | (b) Describe any methods used to examine subgroups and interactions                                                                                                                               | 7                                       |
|                              |         | (c) Explain how missing data were addressed                                                                                                                                                       | 17                                      |
|                              |         | (d) If applicable, explain how loss to follow-up was addressed                                                                                                                                    | 17                                      |
|                              |         | (e) Describe any sensitivity analyses                                                                                                                                                             | Not applicable                          |
| <b>Results</b>               |         |                                                                                                                                                                                                   |                                         |
| Participants                 | 13*     | (a) Report numbers of individuals at each stage of study—eg numbers potentially eligible, examined for eligibility, confirmed eligible, included in the study, completing follow-up, and analysed | 7                                       |
|                              |         | (b) Give reasons for non-participation at each stage                                                                                                                                              | 7                                       |
|                              |         | (c) Consider use of a flow diagram                                                                                                                                                                | Not applicable                          |
| Descriptive data             | 14*     | (a) Give characteristics of study participants (eg demographic, clinical, social) and information on exposures and potential confounders                                                          | 8-9                                     |
|                              |         | (b) Indicate number of participants with missing data for each                                                                                                                                    | Table 1                                 |

|                          |     | variable of interest                                                                                                                                                                                         | (page 8-9)                                  |
|--------------------------|-----|--------------------------------------------------------------------------------------------------------------------------------------------------------------------------------------------------------------|---------------------------------------------|
|                          |     | (c) Summarise follow-up time (eg, average and total amount)                                                                                                                                                  | 5, 12                                       |
| Outcome data             | 15* | Report numbers of outcome events or summary measures over time                                                                                                                                               | 12                                          |
| Main results             | 16  | (a) Give unadjusted estimates and, if applicable, confounder-adjusted estimates and their precision (eg, 95% confidence interval). Make clear which confounders were adjusted for and why they were included | 7<br>Table 2 (page 11)<br>Table 3 (page 13) |
|                          |     | (b) Report category boundaries when continuous variables were categorized                                                                                                                                    | 5                                           |
|                          |     | (c) If relevant, consider translating estimates of relative risk into absolute risk for a meaningful time period                                                                                             | Not applicable                              |
| Other analyses           | 17  | Report other analyses done—eg analyses of subgroups and interactions, and sensitivity analyses                                                                                                               | Not applicable                              |
| <b>Discussion</b>        |     |                                                                                                                                                                                                              |                                             |
| Key results              | 18  | Summarise key results with reference to study objectives                                                                                                                                                     | 14                                          |
| Limitations              | 19  | Discuss limitations of the study, taking into account sources of potential bias or imprecision. Discuss both direction and magnitude of any potential bias                                                   | 17                                          |
| Interpretation           | 20  | Give a cautious overall interpretation of results considering objectives, limitations, multiplicity of analyses, results from similar studies, and other relevant evidence                                   | 18                                          |
| Generalisability         | 21  | Discuss the generalisability (external validity) of the study results                                                                                                                                        | 17                                          |
| <b>Other information</b> |     |                                                                                                                                                                                                              |                                             |
| Funding                  | 22  | Give the source of funding and the role of the funders for the present study and, if applicable, for the original study on which the present article is based                                                | 18                                          |

\*Give information separately for exposed and unexposed groups.

**Note:** An Explanation and Elaboration article discusses each checklist item and gives methodological background and published examples of transparent reporting. The STROBE checklist is best used in conjunction with this article (freely available on the Web sites of PLoS Medicine at <http://www.plosmedicine.org/>, Annals of Internal Medicine at <http://www.annals.org/>, and Epidemiology at <http://www.epidem.com/>). Information on the STROBE Initiative is available at <http://www.strobe-statement.org>.
